# Supplementary material for: Small Nucleolar RNAs Determine Resistance to Doxorubicin in Human Osteosarcoma
Source: MDPI journal article supplement (doi:10.3390/ijms21124500), 2020-06-24
Supplement: s1 [file s1]

# Supplementary Materials

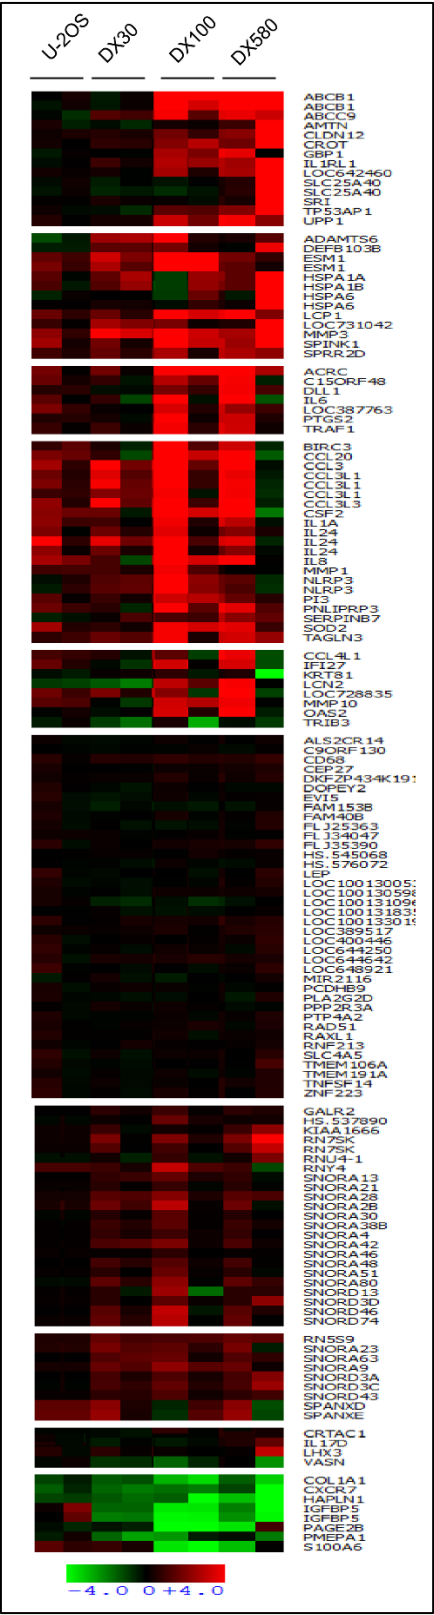

**Figure S1.** snoRNA family is up-regulated in doxorubicin-resistant osteosarcoma cells. Heatmap of wholegenome expression profile of Dox-sensitive U-2OS cells and their resistant variants (U-2OS/DX30, U-2OS/DX100 and U-2OS/DX580), showing the genes significantly up- or down-regulated in resistant variants. The heatmap represents two independent experiments with similar results.

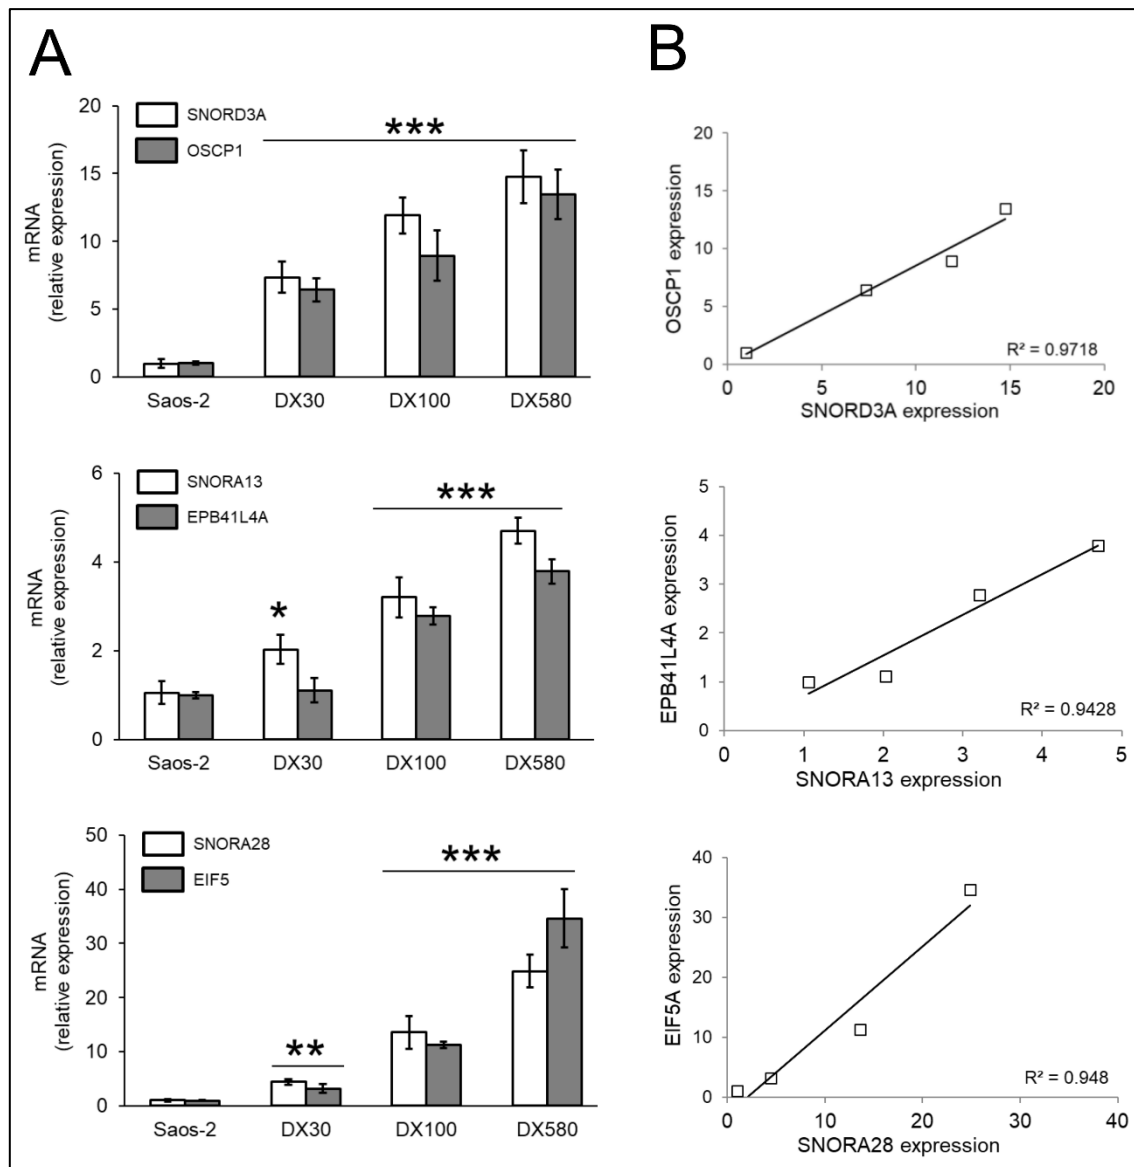

**Figure S2.** SNORD3A, SNORA13 and SNORA28 up-regulation in doxorubicin-resistant osteosarcoma Saos-2 cells. **(A)** mRNA levels of SNORD3A, SNORA13 and SNORA28 and their host genes (OSCP1, EPB41L4A and EIF5) were evaluated by RT-PCR, in triplicates in Saos-2 cells and in their resistant variants (Saos-2/DX30, Saos-2/DX100, Saos-2/DX580). Data are means + SD (n = 3). \* p < 0.05, \*\* p < 0.01, \*\*\* p < 0.001: DX-variants vs. U-2OS cells. **(B)** Linear correlation between the relative expression of snoRNAs and the relative expression of the host genes, according to the RT-PCR results of Figure 2a.

|   | 1      | 2      | 3      | 4      | 5       | 6     | 7     | 8      | 9     | 10     | 11        | 12    |
|---|--------|--------|--------|--------|---------|-------|-------|--------|-------|--------|-----------|-------|
| A | ABCB1  | BIRC5  | CCND1  | CTNNB1 | ESR1    | GATA3 | IL13  | MMP1   | PPARG | RRM2   | STXBP6    | TBP   |
| B | ABL1   | BMP2   | CD5L   | CTSB   | ESR2    | GSK3B | IRS1  | MYC    | PRKCA | SATB1  | TGFB1     | GAPDH |
| C | ACTN1  | BRCA1  | CDKN1A | CXCL10 | ETS1    | HECW1 | JUN   | NBN    | PRKCQ | SCD    | TNC       | HPRT1 |
| D | AKT1   | BTRC   | CDKN1C | CXCL14 | EZR     | HES1  | KDM3A | NEDD9  | PROM1 | SLC6A4 | TNFRSF11B | gDNA  |
| E | APC    | CA2    | CDKN2A | CXCL9  | FGFR2   | IFI30 | LPL   | NELL2  | PTEN  | SMAD4  | TNFSF10   | PCR   |
| F | BAX    | CAMK2G | CHEK1  | CXCR4  | FOS     | IGF1  | MAPK1 | NFKB1  | PTK2  | SOX2   | TOP2A     | RQ1   |
| G | BCL2   | CCL5   | CHL1   | EGF    | FZD7    | IGF1R | MCL1  | OGG1   | RB1   | SPP1   | VEGFA     | RQ2   |
| H | BCL2L1 | CCNB1  | CLDN10 | ERBB2  | GADD45A | IGF2  | MGMT  | PCDH17 | RHOA  | STAT1  | ZNF827    | RT    |

**Figure S3.** PCR array plate scheme of relevant genes in osteosarcoma. Grey: housekeeping genes; blue: internal quality controls.

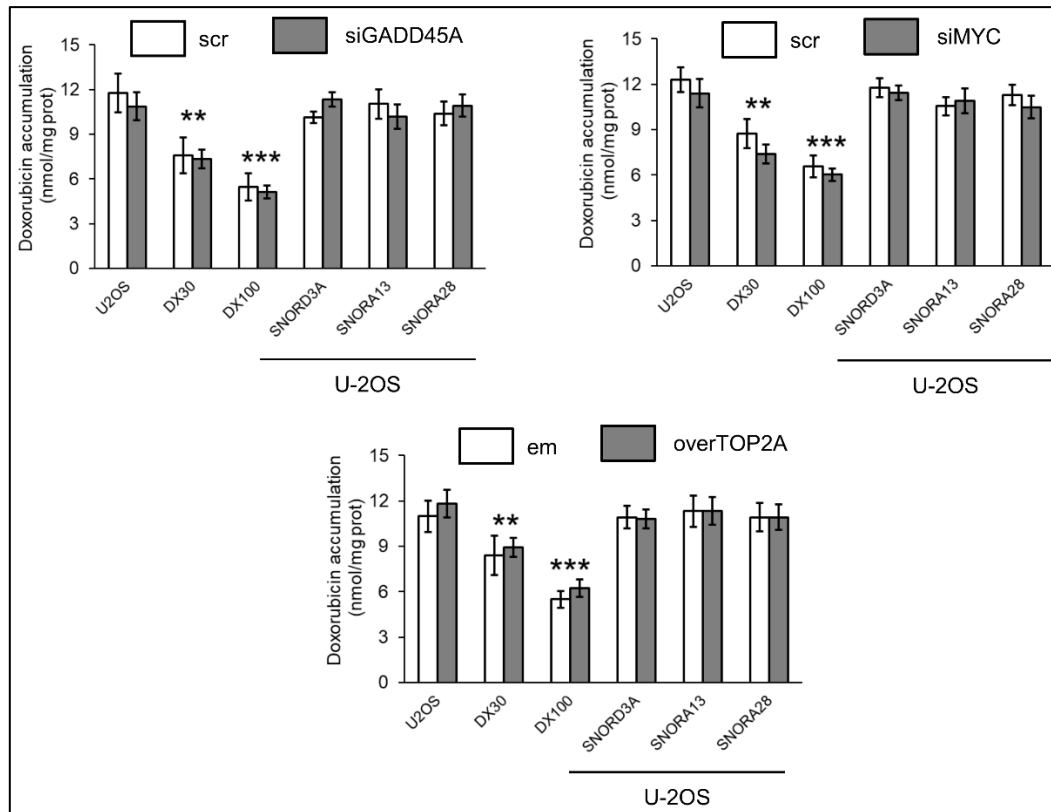

**Figure S4.** Intracellular doxorubicin accumulation in U-2OS cells overexpressing SNORD3A, SNORA13, SNORA28, subjected to GADD45A/MYC silencing or TOP2A overexpression. U-2OS cells were transfected with an expression vector for SNORD3A, SNORA13 or SNORA28. When indicated, cells were transiently transfected with a non-targeting scrambled siRNA pool (scr), with a GADD45A- or MYC-targeting siRNA (siGADD45A/siMYC) pool, with an empty vector (em) or with an expression vector for TOP2A (ovTOP2A). U-2OS/DX30 and U-2OS/DX100 cells were included as doxorubicin-resistant cells. Cells were treated with 5  $\mu$ M doxorubicin for 3 h. Intracellular doxorubicin accumulation, measured fluorimetrically, in duplicates. Data are means  $\pm$  SD (n = 3). \*\* p < 0.01, \*\*\* p < 0.001: U-2OS DX30/DX100 vs. U-2OS cells.

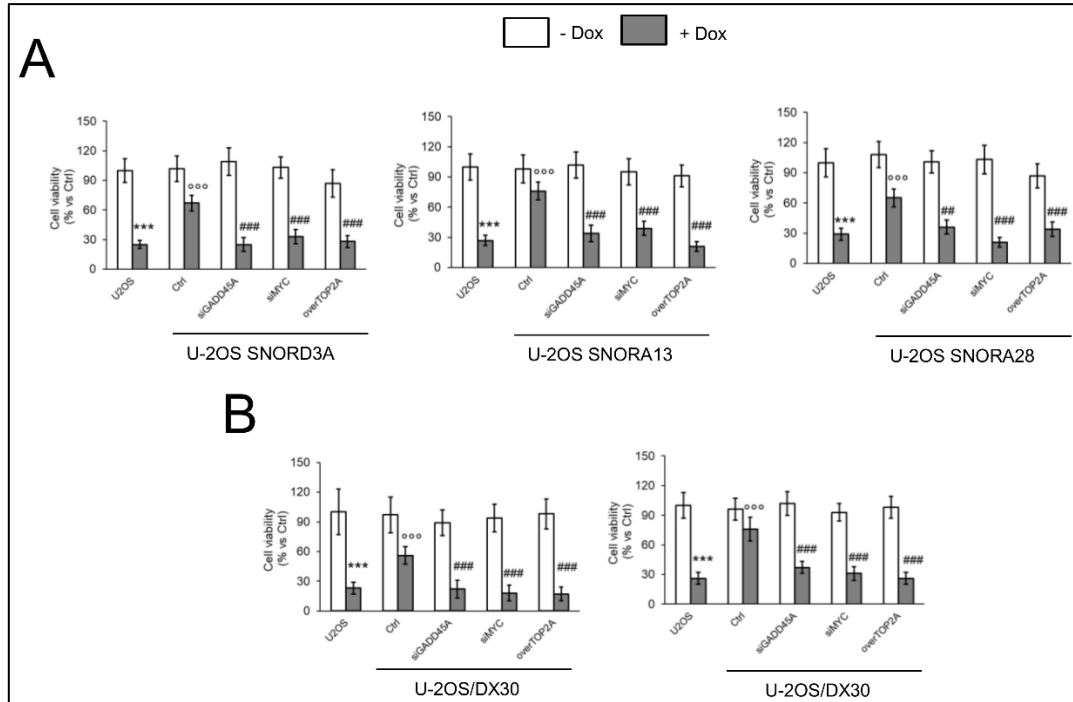

**Figure S5.** Viability of U-2OS cells over-expressing SNORD3A, SNORA13, SNORA28, subjected to GADD45A/MYC silencing or TOP2A overexpression. U-2OS cells were transfected with an expression vector for SNORD3A, SNORA13 or SNORA28. When indicated, cells were transiently transfected with a non-targeting scrambled siRNA pool (scr), with a GADD45A- or MYC-targeting siRNA (siGADD45A/siMYC) pool, with an empty vector (em) or with an expression vector for TOP2A (ovTOP2A). Cells were treated with 5  $\mu$ M doxorubicin (Dox). After 72 h, cells were stained with crystal violet. Spectrophotometric quantitation of the crystal violet staining. Data are means + SD (n = 4). \*\*\* p < 0.001: Dox-treated U-2OS cells vs. untreated (– Dox) cells; °°° p < 0.001: snoRNA-over-expressing U-2OS cells or U-2OS DX30/DX100 vs. U-2OS cells (+ Dox series); ## p < 0.01, ### p < 0.001: siGADD45A/siMYC/overTOP2A cells vs. respective Ctrl cells (+ Dox series).
