# Supplementary material for: Small Nucleolar RNAs Determine Resistance to Doxorubicin in Human Osteosarcoma
Source: Int J Mol Sci. 2020 Jun 24;21(12):4500. doi: 10.3390/ijms21124500 (PMC7349977; doi:10.3390/ijms21124500)
Supplement: Supplementary file 1 [file ijms-21-04500-s001.zip]

Archive with 5 entries (5 files):
- ijms-837014 - supplementary/ijms-837014 - Supplementary - Figures.docx
- ijms-837014 - supplementary/ijms-837014 - Supplementary - Figures.pdf
- ijms-837014 - supplementary/ijms-837014 - Supplementary - Table S1.xlsx
- ijms-837014 - supplementary/ijms-837014 - Supplementary - Table S2.xls
- ijms-837014 - supplementary/ijms-837014 - Supplementary - Table S3.xls
