# Supplementary material for: Small Nucleolar RNAs Determine Resistance to Doxorubicin in Human Osteosarcoma
Source: Int J Mol Sci. 2020 Jun 24;21(12):4500. doi: 10.3390/ijms21124500 (PMC7349977; doi:10.3390/ijms21124500)
Supplement: Supplementary file 1 [file ijms-21-04500-s001.zip › ijms-837014 - supplementary/ijms-837014 - Supplementary - Table S1.xlsx]

## Sheet: A_Annotations
Table S1. List of snoRNAs detected in the gene expression profile of osteosarcoma cells and differential expression analysis.
ID	Symbol	Probe ID	ID	ID	Chromosome	Strand	Gene start	Gene end	Expression start	Expression end	Alias Name	Type	Source	Expression	Host gene	Overlapping gene	Rfam ID	RNA family name	RNA family	Comment	Conservation
4560228	SNORA1	ILMN_3245893	SNORA1_ILMN_3245893	snoID_0521	chr11	-	93465170	93465299	93465300	93465170	SNORA1	HACA	HUGO	100370	TAF1D	SNORA1	RF00408	SNORA1	Small nucleolar RNA SNORA1		Tetrapodes and Teleostes
4610201	SNORA10	ILMN_2189842	SNORA10_ILMN_2189842	snoID_0489	chr16	-	2012335	2012467	2012468	2012335	SNORA10	HACA	HUGO	664421	RPS2	SNORA10	RF00264	SNORA64	Small nucleolar RNA SNORA64/SNORA10 family		Eutherians
4490754	SNORA11	ILMN_3236955	SNORA11_ILMN_3236955	snoID_0529	chrX	+	54840803	54840933	54840802	54840933	SNORA11	HACA	HUGO	61042	MAGED2	SNORA11	RF00614	SNORA11	Small nucleolar RNA SNORA11		Eutherians
3130278	SNORA11B	ILMN_3239704	SNORA11B_ILMN_3239704	snoID_0520	chr14	+	91592770	91592896	91592768	91592895	SNORA11B	HACA	HUGO	100717	C14orf159	SNORA11B	RF00614	SNORA11	Small nucleolar RNA SNORA11		Eutherians
4560370	SNORA11C	ILMN_3240883	SNORA11C_ILMN_3240883	snoID_0543	chrX	+	47248049	47248175	47248047	47248175	SNORA11C	HACA	HUGO	4956	ZNF157	SNORA11C	RF00614	SNORA11	Small nucleolar RNA SNORA11		Eutherians
650402	SNORA11D	ILMN_3242448	SNORA11D_ILMN_3242448	snoID_0461	chrX	+	51933718	51933844	51933716	51933844	SNORA11D	HACA	HUGO	3878001	MAGED4	SNORA11D	RF00614	SNORA11	Small nucleolar RNA SNORA11		Eutherians
4920435	SNORA11E	ILMN_3243921	SNORA11E_ILMN_3243921	snoID_0462	chrX	-	51806443	51806569	51806571	51806443	SNORA11E	HACA	HUGO	3878001	MAGED4B	SNORA11E	RF00614	SNORA11	Small nucleolar RNA SNORA11		Eutherians
6510156	SNORA12	ILMN_3238435	SNORA12_ILMN_3238435	snoID_0511	chr10	-	101996913	101997059	101997058	101996912	SNORA12	HACA	HUGO	158125	CWF19L1	SNORA12	RF00586	SNORA12	Small nucleolar RNA SNORA12		Therians
6860451	SNORA13	ILMN_3241985	SNORA13_ILMN_3241985	snoID_0499	chr5	+	111497182	111497314	111497180	111497314	SNORA13	HACA	HUGO	302152	EPB41L4A-AS1	SNORA13	RF00396	SNORA13	Small nucleolar RNA SNORA13		Vertebrates
5810343	SNORA14A	ILMN_3241036	SNORA14A_ILMN_3241036	snoID_0528	chr7	+	75573101	75573234	75573100	75573234	SNORA14A	HACA	HUGO	63845	POR	SNORA14A	RF00397	SNORA14	Small nucleolar RNA SNORA14		Amniotes
5690670	SNORA14B	ILMN_3241140	SNORA14B_ILMN_3241140	snoID_0495	chr1	-	235291118	235291252	235291252	235291118	SNORA14B	HACA	HUGO	398365	TOMM20	SNORA14B	RF00397	SNORA14	Small nucleolar RNA SNORA14		Amniotes
2320543	SNORA15	ILMN_3241884	SNORA15_ILMN_3241884	snoID_0537	chr7	+	56128163	56128295	56128160	56128295	SNORA15	HACA	HUGO	24181	CCT6A	SNORA15	RF00398	SNORA15	Small nucleolar RNA SNORA15		Therians
2640092	SNORA16A	ILMN_3246465	SNORA16A_ILMN_3246465	snoID_0482	chr1	-	28907432	28907565	28907565	28907432	SNORA16A	HACA	HUGO	1238337	SNHG12	SNORA16A	RF00190	SNORA16	Small nucleolar RNA SNORA16B/SNORA16A family		Deuterostomes
460414	SNORA16B	ILMN_3248658	SNORA16B_ILMN_3248658	snoID_0552	chr1	+	212526160	212526292	212526159	212526288	SNORA16B	HACA	HUGO	160	PPP2R5A	SNORA16B	RF00190	SNORA16	Small nucleolar RNA SNORA16B/SNORA16A family	low expression	Deuterostomes
2940204	SNORA17	ILMN_3243129	SNORA17_ILMN_3243129	snoID_0484	chr9	-	139621199	139621331	139621331	139621199	SNORA17	HACA	HUGO	1070812	SNHG7	SNORA17	RF00560	SNORA17	Small nucleolar RNA SNORA17		Deuterostomes
1090148	SNORA18	ILMN_3244348	SNORA18_ILMN_3244348	snoID_0479	chr11	-	93466632	93466763	93466763	93466633	SNORA18	HACA	HUGO	1311979	TAF1D	SNORA18	RF00425	SNORA18	Small nucleolar RNA SNORA18		Tetrapodes and Teleostes
4210259	SNORA19	ILMN_3242748	SNORA19_ILMN_3242748	snoID_0531	chr10	-	120819523	120819650	120819650	120819527	SNORA19	HACA	HUGO	55193	EIF3A	SNORA19	RF00413	SNORA19	Small nucleolar RNA SNORA19		Vertebrates
1050575	SNORA20	ILMN_3245228	SNORA20_ILMN_3245228	snoID_0480	chr6	-	160201282	160201413	160201413	160201282	SNORA20	HACA	HUGO	1280339	TCP1	SNORA20	RF00401	SNORA20	Small nucleolar RNA SNORA20		Deuterostomes
5910577	SNORA21	ILMN_3244343	SNORA21_ILMN_3244343	snoID_0447	chr17	-	37009116	37009248	37009249	37009117	SNORA21	HACA	HUGO	27170964	RPL23	SNORA21	RF00412	SNORA21	Small nucleolar RNA SNORA21		Tetrapodes and Teleostes
6330138	SNORA22	ILMN_3246713	SNORA22_ILMN_3246713	snoID_0539	chr7	+	65220513	65220646	65220513	65220646	SNORA22	HACA	HUGO	16595	CCT6P1	SNORA22	RF00414	SNORA22	Small nucleolar RNA SNORA22		Tetrapodes and Teleostes
110576	SNORA23	ILMN_3247939	SNORA23_ILMN_3247939	snoID_0481	chr11	+	9450313	9450501	9450313	9450499	SNORA23	HACA	HUGO	1262349	IPO7	SNORA23	RF00319	SNORA23	Small nucleolar RNA SNORA23		Tetrapodes and Teleostes
5690240	SNORA24	ILMN_3248890	SNORA24_ILMN_3248890	snoID_0474	chr4	+	119200345	119200475	119200345	119200475	SNORA24	HACA	HUGO	1718228	SNHG8	SNORA24	RF00399	SNORA24	Small nucleolar RNA SNORA24		Tetrapodes and Teleostes
4850278	SNORA25	ILMN_1682038	SNORA25_ILMN_1682038	snoID_0453	chr11	-	93463679	93463812	93463813	93463683	SNORA25	HACA	HUGO	11749899	TAF1D	SNORA25	RF00402	SNORA25	Small nucleolar RNA SNORA25		Tetrapodes and Teleostes
2570609	SNORA26	ILMN_3238613	SNORA26_ILMN_3238613	snoID_0493	chr4	+	53579416	53579537	53579405	53579537	SNORA26	HACA	HUGO	475119	DANCR	SNORA26	RF00568	SNORA26	Small nucleolar RNA SNORA26		Vertebrates
6420647	SNORA27	ILMN_3248811	SNORA27_ILMN_3248811	snoID_0519	chr13	+	27829538	27829663	27829538	27829663	SNORA27	HACA	HUGO	102600	RPL21	SNORA27	RF00443	SNORA27	Small nucleolar RNA SNORA27		Vertebrates
1780008	SNORA28	ILMN_3235096	SNORA28_ILMN_3235096	snoID_0475	chr14	+	103804186	103804311	103804182	103804312	SNORA28	HACA	HUGO	1710106	EIF5	SNORA28	RF00400	SNORA28	Small nucleolar RNA SNORA28		Vertebrates
1440730	SNORA29	ILMN_3236594	SNORA29_ILMN_3236594	snoID_0553	chr6	-	160206626	160206765	160206765	160206617	SNORA29	HACA	HUGO	65	TCP1	SNORA29	RF00429	SNORA29	Small nucleolar RNA SNORA29	low expression	Vertebrates
7000097	SNORA2A	ILMN_3248232	SNORA2A_ILMN_3248232	snoID_0460	chr12	-	49050431	49050565	49050565	49050431	SNORA2A	HACA	HUGO	4387606	KANSL2	SNORA2A	RF00410	SNORA2	Small nucleolar RNA SNORA2/SNORA34 family		Vertebrates
5390767	SNORA2B	ILMN_3249538	SNORA2B_ILMN_3249538	snoID_0506	chr12	-	49061240	49061376	49061376	49061241	SNORA2B	HACA	HUGO	209564	KANSL2	SNORA2B	RF00410	SNORA2	Small nucleolar RNA SNORA2/SNORA34 family		Vertebrates
7330463	SNORA3	ILMN_3239108	SNORA3_ILMN_3239108	snoID_0468	chr11	+	8705774	8705903	8705774	8705903	SNORA3	HACA	HUGO	2559854	RPL27A	SNORA3	RF00334	SNORA3	Small nucleolar RNA SNORA3/SNORA45 family		Vertebrates
4560138	SNORA30	ILMN_3238259	SNORA30_ILMN_3238259	snoID_0490	chr16	+	30721858	30721986	30721858	30721986	SNORA30	HACA	HUGO	619652	SRCAP	SNORA30	RF00415	SNORA30	Small nucleolar RNA SNORA30/SNORA37 family		Tetrapodes and Teleostes
2690288	SNORA31	ILMN_3239162	SNORA31_ILMN_3239162	snoID_0486	chr13	-	45911615	45911744	45911744	45911615	SNORA31	HACA	HUGO	952061	TPT1	SNORA31	RF00322	SNORA31	Small nucleolar RNA SNORA31	Modification of RN7SL	Vertebrates
5890477	SNORA32	ILMN_2085525	SNORA32_ILMN_2085525	snoID_0510	chr11	-	93464145	93464265	93464267	93464145	SNORA32	HACA	HUGO	165933	TAF1D	SNORA32	RF00421	SNORA32	Small nucleolar RNA SNORA32		Tetrapodes and Teleostes
6510433	SNORA33	ILMN_2096747	SNORA33_ILMN_2096747	snoID_0488	chr6	+	133138358	133138490	133138358	133138486	SNORA33	HACA	HUGO	757319	RPS12	SNORA33	RF00438	SNORA33	Small nucleolar RNA SNORA33		Tetrapodes and Teleostes
6270414	SNORA34	ILMN_3240231	SNORA34_ILMN_3240231	snoID_0465	chr12	-	49048165	49048301	49048301	49048165	SNORA34	HACA	HUGO	3559104	KANSL2	SNORA34	RF00410	SNORA2	Small nucleolar RNA SNORA2/SNORA34 family	overlapping miR-1291	Vertebrates
380324	SNORA35	ILMN_3249351	SNORA35_ILMN_3249351	snoID_0541	chrX	+	113865259	113865386	113865259	113865386	SNORA35	HACA	HUGO	10886	HTR2C	SNORA35	RF00566	SNORA35	Small nucleolar RNA SNORA35		Eutherians
580373	SNORA36A	ILMN_3241814	SNORA36A_ILMN_3241814	snoID_0530	chrX	+	153996803	153996934	153996803	153996930	SNORA36A	HACA	HUGO	56490	DKC1	SNORA36A	RF00340	SNORA36	Small nucleolar RNA SNORA36 family		Tetrapodes and Teleostes
4490102	SNORA36B	ILMN_3247494	SNORA36B_ILMN_3247494	snoID_0522	chr1	-	220373888	220374018	220374018	220373892	SNORA36B	HACA	HUGO	87235	RAB3GAP2	SNORA36B	RF00340	SNORA36	Small nucleolar RNA SNORA36 family	overlapping miR-664	Tetrapodes and Teleostes
1470722	SNORA36C	ILMN_3235334	SNORA36C_ILMN_3235334	snoID_0533	chr2	-	69747176	69747303	69747306	69747179	SNORA36C	HACA	HUGO	43821	AAK1	SNORA36C	RF00340	SNORA36	Small nucleolar RNA SNORA36 family		Tetrapodes and Teleostes
3120020	SNORA37	ILMN_3243135	SNORA37_ILMN_3243135	snoID_0496	chr18	-	51748654	51748782	51748782	51748654	SNORA37	HACA	HUGO	382208	MBD2	SNORA37	RF00415	SNORA30	Small nucleolar RNA SNORA30/SNORA37 family		Tetrapodes and Teleostes
3370537	SNORA38	ILMN_3244597	SNORA38_ILMN_3244597	snoID_0504	chr6	+	31590856	31590987	31590855	31590983	SNORA38	HACA	HUGO	229140	PRRC2A	SNORA38	RF00428	SNORA38	Small nucleolar RNA SNORA38	Regulation of chromatin structure	Therians
380017	SNORA38B	ILMN_3235270	SNORA38B_ILMN_3235270	snoID_0516	chr17	+	65736786	65736917	65736783	65736915	SNORA38B	HACA	HUGO	114513	NOL11	SNORA38B	RF00428	SNORA38	Small nucleolar RNA SNORA38		Therians
3830343	SNORA39	ILMN_3245764	SNORA39_ILMN_3245764	snoID_0509	chr20	+	37076726	37076861	37076726	37076861	SNORA39	HACA	HUGO	167922	SNHG11	SNORA39	RF00056	SNORA71	Small nucleolar RNA SNORA71		Vertebrates
5490465	SNORA4	ILMN_3238672	SNORA4_ILMN_3238672	snoID_0448	chr3	+	186505402	186505538	186505402	186505538	SNORA4	HACA	HUGO	24460539	EIF4A2	SNORA4	RF00394	SNORA4	Small nucleolar RNA SNORA4		Tetrapodes and Teleostes
6520164	SNORA40	ILMN_3247222	SNORA40_ILMN_3247222	snoID_0513	chr11	-	93468276	93468402	93468404	93468277	SNORA40	HACA	HUGO	153611	TAF1D	SNORA40	RF00561	SNORA40	Small nucleolar RNA SNORA40	Regulation of chromatin structure	Vertebrates
3450327	SNORA41	ILMN_3241798	SNORA41_ILMN_3241798	snoID_0456	chr2	+	207026952	207027083	207026952	207027081	SNORA41	HACA	HUGO	9379730	EEF1B2	SNORA41	RF00403	SNORA41	Small nucleolar RNA SNORA41		Vertebrates
6960438	SNORA42	ILMN_3248575	SNORA42_ILMN_3248575	snoID_0505	chr1	-	155889700	155889833	155889838	155889700	SNORA42	HACA	HUGO	220530	KIAA0907	SNORA42	RF00406	SNORA42	Small nucleolar RNA SNORA42/SNORA80 family		Vertebrates
7210538	SNORA43	ILMN_3243908	SNORA43_ILMN_3243908	snoID_0463	chr9	-	139620556	139620689	139620704	139620557	SNORA43	HACA	HUGO	3794469	SNHG7	SNORA43	RF00416	SNORA43	Small nucleolar RNA SNORA43	Regulation of chromatin structure	Deuterostomes
2690619	SNORA45	ILMN_3238078	SNORA45_ILMN_3238078	snoID_0450	chr11	+	8706986	8707116	8706986	8707116	SNORA45	HACA	HUGO	18746700	RPL27A	SNORA45	RF00334	SNORA3	Small nucleolar RNA SNORA3/SNORA45 family		Vertebrates
1110086	SNORA46	ILMN_3239276	SNORA46_ILMN_3239276	snoID_0485	chr16	-	58582403	58582537	58582538	58582403	SNORA46	HACA	HUGO	1062572	CNOT1	SNORA46	RF00404	SNORA46	Small nucleolar RNA SNORA46		Tetrapodes and Teleostes
4220072	SNORA47	ILMN_3238670	SNORA47_ILMN_3238670	snoID_0538	chr5	-	76376259	76376396	76376397	76376260	SNORA47	HACA	HUGO	23458	ZBED3	SNORA47	RF01234	SNORA47	Small nucleolar RNA SNORA47		Amniotes
3360703	SNORA48	ILMN_3235264	SNORA48_ILMN_3235264	snoID_0501	chr17	+	7478031	7478165	7478031	7478165	SNORA48	HACA	HUGO	258514	SENP3-EIF4A1	SNORA48	RF00554	SNORA48	Small nucleolar RNA SNORA48		Vertebrates
450682	SNORA49	ILMN_3235231	SNORA49_ILMN_3235231	snoID_0473	chr12	+	132515769	132515905	132515769	132515905	SNORA49	HACA	HUGO	1770801	EP400	SNORA49	RF00562	SNORA49	Small nucleolar RNA SNORA49		Tetrapodes and Teleostes
1510475	SNORA50	ILMN_3242825	SNORA50_ILMN_3242825	snoID_0508	chr16	-	58593700	58593835	58593835	58593700	SNORA50	HACA	HUGO	180186	CNOT1	SNORA50	RF00407	SNORA50	Small nucleolar RNA SNORA50		Vertebrates
6760132	SNORA51	ILMN_3235316	SNORA51_ILMN_3235316	snoID_0469	chr20	+	2635713	2635844	2635713	2635844	SNORA51	HACA	HUGO	2511268	NOP56	SNORA51	RF00432	SNORA51	Small nucleolar RNA SNORA51		Tetrapodes and Teleostes
1820400	SNORA52	ILMN_3247679	SNORA52_ILMN_3247679	snoID_0512	chr11	+	811681	811814	811681	811814	SNORA52	HACA	HUGO	156260	RPLP2	SNORA52	RF00419	SNORA52	Small nucleolar RNA SNORA52		Amniotes
6960433	SNORA53	ILMN_3239932	SNORA53_ILMN_3239932	snoID_0498	chr12	+	98993413	98993662	98993412	98993662	SNORA53	HACA	HUGO	337558	SLC25A3	SNORA53	RF00563	SNORA53	Small nucleolar RNA SNORA53		Tetrapodes
2810402	SNORA54	ILMN_3237035	SNORA54_ILMN_3237035	snoID_0524	chr11	-	2985001	2985123	2985123	2985001	SNORA54	HACA	HUGO	79872	NAP1L4	SNORA54	RF00430	SNORA54	Small nucleolar RNA SNORA54		Vertebrates
3390360	SNORA55	ILMN_3238745	SNORA55_ILMN_3238745	snoID_0535	chr1	-	40033046	40033182	40033182	40033046	SNORA55	HACA	HUGO	30797	PABPC4	SNORA55	RF00431	SNORA55	Small nucleolar RNA SNORA55		Tetrapodes
4060025	SNORA56	ILMN_3240280	SNORA56_ILMN_3240280	snoID_0540	chrX	+	154003273	154003401	154003273	154003401	SNORA56	HACA	HUGO	14415	DKC1	SNORA56	RF00417	SNORA56	Small nucleolar RNA SNORA56		Tetrapodes and Teleostes
4850711	SNORA57	ILMN_3235404	SNORA57_ILMN_3235404	snoID_0472	chr11	+	62432894	62433042	62432892	62433042	SNORA57	HACA	HUGO	1857248	METTL12	SNORA57	RF00191	SNORA57	Small nucleolar RNA SNORA57		Deuterostomes
3850646	SNORA58	ILMN_3242067	SNORA58_ILMN_3242067	snoID_0517	chr3	-	131197842	131198077	131198077	131197940	SNORA58	HACA	HUGO	114433	MRPL3	SNORA58	RF00418	SNORA58	Small nucleolar RNA SNORA58		Tetrapodes and Teleostes
1090671	SNORA59A	ILMN_3240116	SNORA59A_ILMN_3240116	snoID_0545	chr1	+	12567300	12567451	12567299	12567451	SNORA59A	HACA	HUGO	4327	VPS13D	SNORA59A	RF01293	ACA59	Small nucleolar RNA ACA59		Primates
6980594	SNORA59B	ILMN_3247251	SNORA59B_ILMN_3247251	snoID_0544	chr17	+	19460873	19461024	19460872	19461024	SNORA59B	HACA	HUGO	4327	SLC47A1	SNORA59B	RF01293	ACA59	Small nucleolar RNA ACA59		Primates
2260524	SNORA5A	ILMN_3236942	SNORA5A_ILMN_3236942	snoID_0502	chr7	-	45143948	45144081	45144082	45143949	SNORA5A	HACA	HUGO	240581	TBRG4	SNORA5A	RF00392	SNORA5	Small nucleolar RNA SNORA5		Tetrapodes and Teleostes
20349	SNORA5B	ILMN_3244678	SNORA5B_ILMN_3244678	snoID_0546	chr7	-	45145567	45145698	45145700	45145568	SNORA5B	HACA	HUGO	3577	TBRG4	SNORA5B	RF00392	SNORA5	Small nucleolar RNA SNORA5		Tetrapodes and Teleostes
2320523	SNORA5C	ILMN_3246708	SNORA5C_ILMN_3246708	snoID_0526	chr7	-	45144505	45144641	45144642	45144505	SNORA5C	HACA	HUGO	64650	TBRG4	SNORA5C	RF00392	SNORA5	Small nucleolar RNA SNORA5		Tetrapodes and Teleostes
6980653	SNORA6	ILMN_3245365	SNORA6_ILMN_3245365	snoID_0492	chr3	+	39449882	39450030	39449881	39450030	SNORA6	HACA	HUGO	513975	RPSA	SNORA6	RF00091	SNORA62	Small nucleolar RNA SNORA62/SNORA6 family		Deuterostomes
4920296	SNORA60	ILMN_3243894	SNORA60_ILMN_3243894	snoID_0525	chr20	+	37078012	37078149	37078012	37078149	SNORA60	HACA	HUGO	77417	SNHG11	SNORA60	RF00056	SNORA71	Small nucleolar RNA SNORA71		Vertebrates
3990497	SNORA61	ILMN_3245458	SNORA61_ILMN_3245458	snoID_0455	chr1	-	28906276	28906405	28906405	28906276	SNORA61	HACA	HUGO	9535411	SNHG12	SNORA61	RF00420	SNORA61	Small nucleolar RNA SNORA61		Tetrapodes and Teleostes
5870475	SNORA62	ILMN_1700074	SNORA62_ILMN_1700074	snoID_0451	chr3	+	39452545	39452698	39452546	39452698	SNORA62	HACA	HUGO	17837817	RPSA	SNORA62	RF00091	SNORA62	Small nucleolar RNA SNORA62/SNORA6 family	Regulation of chromatin structure	Deuterostomes
4200711	SNORA63	ILMN_3249167	SNORA63_ILMN_3249167	snoID_0515	chr3	+	186505088	186505222	186505088	186505222	SNORA63	HACA	HUGO	143075	EIF4A2	SNORA63	RF00092	SNORA63	Small nucleolar RNA SNORA63		Vertebrates
7560731	SNORA64	ILMN_1709604	SNORA64_ILMN_1709604	snoID_0452	chr16	-	2012974	2013107	2013107	2012974	SNORA64	HACA	HUGO	12884971	RPS2	SNORA64	RF00264	SNORA64	Small nucleolar RNA SNORA64/SNORA10 family	Regulation of chromatin structure	Amniotes
2640019	SNORA65	ILMN_1787326	SNORA65_ILMN_1787326	snoID_0491	chr9	-	130210781	130210916	130210915	130210780	SNORA65	HACA	HUGO	574401	RPL12	SNORA65	RF00302	SNORA65	Small nucleolar RNA SNORA65		Deuterostomes
3180608	SNORA66	ILMN_1689616	SNORA66_ILMN_1689616	snoID_0500	chr1	+	93306276	93306408	93306276	93306408	SNORA66	HACA	HUGO	268252	RPL5	SNORA66	RF00155	SNORA66	Small nucleolar RNA SNORA66		Tetrapodes
1240577	SNORA67	ILMN_3247018	SNORA67_ILMN_3247018	snoID_0477	chr17	+	7481273	7481409	7481273	7481409	SNORA67	HACA	HUGO	1633800	SENP3-EIF4A1	SNORA67	RF00272	SNORA67	Small nucleolar RNA SNORA67		Eutherians
2260437	SNORA68	ILMN_3244592	SNORA68_ILMN_3244592	snoID_0457	chr19	+	17973397	17973529	17973397	17973529	SNORA68	HACA	HUGO	8591178	RPL18A	SNORA68	RF00263	SNORA68	Small nucleolar RNA SNORA68		Deuterostomes
4280369	SNORA69	ILMN_3244883	SNORA69_ILMN_3244883	snoID_0527	chrX	-	118921316	118921447	118921447	118921316	SNORA69	HACA	HUGO	64440	RPL39	SNORA69	RF00265	SNORA69	Small nucleolar RNA SNORA69		Tetrapodes and Teleostes
650278	SNORA70	ILMN_1730773	SNORA70_ILMN_1730773	snoID_0449	chrX	+	153628622	153628756	153628622	153628756	SNORA70	HACA	HUGO	19337128	RPL10	SNORA70	RF00156	SNORA70	Small nucleolar RNA SNORA70	Modification of RN7SK	Vertebrates
2000181	SNORA70B	ILMN_3243972	SNORA70B_ILMN_3243972	snoID_0536	chr2	-	61644379	61644512	61644513	61644379	SNORA70B	HACA	HUGO	28654	USP34	SNORA70B	RF00156	SNORA70	Small nucleolar RNA SNORA70		Vertebrates
1470343	SNORA70C	ILMN_3245878	SNORA70C_ILMN_3245878	snoID_0550	chr9	-	119943345	119943480	119943480	119943345	SNORA70C	HACA	HUGO	381	ASTN2	SNORA70C	RF00156	SNORA70	Small nucleolar RNA SNORA70	low expression	Vertebrates
4890546	SNORA71A	ILMN_3245605	SNORA71A_ILMN_3245605	snoID_0467	chr20	-	37055949	37056086	37056086	37055949	SNORA71A	HACA	HUGO	2686742	SNHG17	SNORA71A	RF00056	SNORA71	Small nucleolar RNA SNORA71		Vertebrates
7650079	SNORA71B	ILMN_3243667	SNORA71B_ILMN_3243667	snoID_0466	chr20	-	37053843	37053978	37053980	37053843	SNORA71B	HACA	HUGO	3174206	SNHG17	SNORA71B	RF00056	SNORA71	Small nucleolar RNA SNORA71		Vertebrates
4540092	SNORA71C	ILMN_3240216	SNORA71C_ILMN_3240216	snoID_0534	chr20	-	37058310	37058447	37058447	37058310	SNORA71C	HACA	HUGO	37314	SNHG17	SNORA71C	RF00056	SNORA71	Small nucleolar RNA SNORA71		Vertebrates
5910050	SNORA71D	ILMN_3241937	SNORA71D_ILMN_3241937	snoID_0446	chr20	-	37062505	37062642	37062642	37062505	SNORA71D	HACA	HUGO	44664728	SNHG17	SNORA71D	RF00056	SNORA71	Small nucleolar RNA SNORA71		Vertebrates
3180647	SNORA72	ILMN_3240418	SNORA72_ILMN_3240418	snoID_0494	chr8	-	99054314	99054445	99054445	99054314	SNORA72	HACA	HUGO	462243	RPL30	SNORA72	RF00139	SNORA72	Small nucleolar RNA SNORA72	Regulation of chromatin structure	Tetrapodes and Teleostes
7550593	SNORA73A	ILMN_3240022	SNORA73A_ILMN_3240022	snoID_0464	chr1	+	28833877	28834083	28833877	28834083	SNORA73A	HACA	HUGO	3772282	RCC1	U17A	RF00045	SNORA73	Small nucleolar RNA SNORA73 family	Cleavage of pre-rRNA;Regulation of chromatin structure	Deuterostomes
6620039	SNORA73B	ILMN_3243677	SNORA73B_ILMN_3243677	snoID_0459	chr1	+	28835070	28835274	28835070	28835274	SNORA73B	HACA	HUGO	6043639	RCC1	SNORA73B	RF00045	SNORA73	Small nucleolar RNA SNORA73 family	Cleavage of pre-rRNA; Regulation of chromatin structure	Deuterostomes
4480544	SNORA74A	ILMN_3236224	SNORA74A_ILMN_3236224	snoID_0483	chr5	+	138614469	138614668	138614469	138614668	SNORA74A	HACA	HUGO	1084119	MATR3	SNORA74A	RF00090	SNORA74	Small nucleolar RNA SNORA74	Regulation of chromatin structure	Vertebrates
3170598	SNORA74B	ILMN_3246935	SNORA74B_ILMN_3246935	snoID_0458	chr5	+	172447729	172447932	172447730	172447932	SNORA74B	HACA	HUGO	6202921	ATP6V0E1	SNORA74B	RF00090	SNORA74	Small nucleolar RNA SNORA74	Regulation of chromatin structure	Vertebrates
6590164	SNORA75	ILMN_3240150	SNORA75_ILMN_3240150	snoID_0478	chr2	-	232320511	232320647	232320647	232320511	SNORA75	HACA	HUGO	1609100	NCL	SNORA75	RF00072	SNORA75	Small nucleolar RNA SNORA75	Regulation of chromatin structure	Vertebrates
4230477	SNORA76	ILMN_3237562	SNORA76_ILMN_3237562	snoID_0470	chr17	+	62223699	62223831	62223697	62223830	SNORA76	HACA	HUGO	2454646	NA	SNORA76	RF00598	SNORA76	Small nucleolar RNA SNORA76		Vertebrates
2680040	SNORA77	ILMN_3243428	SNORA77_ILMN_3243428	snoID_0471	chr1	+	203698709	203698833	203698707	203698831	SNORA77	HACA	HUGO	2152556	ATP2B4	SNORA77	RF00599	SNORA77	Small nucleolar RNA SNORA77		Tetrapodes and Teleostes
3460450	SNORA78	ILMN_3244940	SNORA78_ILMN_3244940	snoID_0542	chr16	+	2015185	2015311	2015180	2015311	SNORA78	HACA	HUGO	6157	SNHG9	SNORA78	RF01225	ACA64	Small nucleolar RNA ACA64		Tetrapodes and Teleostes
1090196	SNORA79	ILMN_3246206	SNORA79_ILMN_3246206	snoID_0518	chr14	-	81669039	81669178	81669180	81669039	SNORA79	HACA	HUGO	107355	GTF2A1	SNORA79	RF00600	SNORA79	Small nucleolar RNA SNORA79		Vertebrates
4010193	SNORA7A	ILMN_3241993	SNORA7A_ILMN_3241993	snoID_0503	chr3	-	12881811	12881949	12881949	12881811	SNORA7A	HACA	HUGO	232811	RPL32	SNORA7A	RF00409	SNORA7	Small nucleolar RNA SNORA7		Tetrapodes and Teleostes
7570110	SNORA7B	ILMN_1660900	SNORA7B_ILMN_1660900	snoID_0532	chr3	-	129116053	129116191	129116191	129116053	SNORA7B	HACA	HUGO	52974	RPL32P3	SNORA7B	RF00409	SNORA7	Small nucleolar RNA SNORA7		Tetrapodes and Teleostes
3800278	SNORA8	ILMN_3238707	SNORA8_ILMN_3238707	snoID_0476	chr11	-	93465527	93465665	93465666	93465528	SNORA8	HACA	HUGO	1674927	TAF1D	SNORA8	RF00393	SNORA8	Small nucleolar RNA SNORA8		Vertebrates
5260280	SNORA80	ILMN_3238554	SNORA80_ILMN_3238554	snoID_0497	chr21	-	33749496	33749631	33749633	33749497	SNORA80	HACA	HUGO	350672	URB1	SNORA80	RF00406	SNORA42	Small nucleolar RNA SNORA42/SNORA80 family		Vertebrates
6040121	SNORA81	ILMN_3248440	SNORA81_ILMN_3248440	snoID_0487	chr3	+	186504464	186504641	186504464	186504641	SNORA81	HACA	HUGO	857420	EIF4A2	SNORA81	RF01241	SNORA81	Small nucleolar RNA SNORA81	overlapping miR-1248 & Regulation of chromatin structure	Vertebrates
870053	SNORA84	ILMN_3244154	SNORA84_ILMN_3244154	snoID_0523	chr9	-	95054743	95054875	95054876	95054744	SNORA84	HACA	HUGO	83960	IARS	SNORA84	RF01229	SNORA84	Small nucleolar RNA SNORA84		Tetrapodes and Teleostes
2750523	SNORA9	ILMN_3235969	SNORA9_ILMN_3235969	snoID_0507	chr7	-	45024977	45025109	45025109	45024977	SNORA9	HACA	HUGO	205473	SNHG15	SNORA9	RF00411	SNORA9	Small nucleolar RNA SNORA9		Vertebrates
1850551	SNORD10	ILMN_3238955	SNORD10_ILMN_3238955	snoID_0011	chr17	+	7480129	7480276	7480130	7480270	SNORD10	CD	HUGO	29256584	SENP3-EIF4A1	SNORD10	RF01290	SNORD10	Small nucleolar RNA SNORD10		Tetrapodes and Teleostes
5890692	SNORD100	ILMN_1673181	SNORD100_ILMN_1673181	snoID_0098	chr6	+	133137941	133138016	133137944	133138009	SNORD100	CD	HUGO	914053	RPS12	SNORD100	RF00609	SNORD100	Small nucleolar RNA SNORD100	sdRNA with mi-RNA like capability	Vertebrates
3400139	SNORD101	ILMN_1697989	SNORD101_ILMN_1697989	snoID_0036	chr6	+	133136446	133136518	133136447	133136514	SNORD101	CD	HUGO	6514692	RPS12	SNORD101	RF00186	SNORD101	Small nucleolar RNA SNORD101		Vertebrates
770452	SNORD102	ILMN_3243909	SNORD102_ILMN_3243909	snoID_0082	chr13	+	27829201	27829272	27829203	27829272	SNORD102	CD	HUGO	1524383	RPL21	SNORD102	RF00187	SNORD102	Small nucleolar RNA SNORD102		Tetrapodes and Teleostes
4760121	SNORD103A	ILMN_3234751	SNORD103A_ILMN_3234751	snoID_0123	chr1	-	31408536	31408623	31408618	31408536	SNORD103A	CD	HUGO	476233	PUM1	SNORD103A	RF00188	SNORD103	Small nucleolar RNA SNORD103/SNORD85		Vertebrates
6290091	SNORD104	ILMN_3248218	SNORD104_ILMN_3248218	snoID_0027	chr17	+	62223438	62223517	62223441	62223514	SNORD104	CD	HUGO	7497039	NA	SNORD104	RF00289	SNORND104	Small nucleolar RNA SNORD104		Eutherians
5080095	SNORD105	ILMN_3234984	SNORD105_ILMN_3234984	snoID_0150	chr19	+	10218327	10218411	10218334	10218400	SNORD105	CD	HUGO	346093	PPAN	SNORD105	RF00584	SNORD105	Small nucleolar RNA SNORD105		Eutherians
1230491	SNORD107	ILMN_2132082	SNORD107_ILMN_2132082	snoID_0223	chr15	+	25227141	25227215	25227142	25227195	SNORD107	CD	HUGO	32073	SNRPN	SNORD107	RF01164	SNORD107	Small nucleolar RNA SNORD107		Eutherians
2120369	SNORD107	ILMN_1750402	SNORD107_ILMN_1750402	snoID_0223	chr15	+	25227141	25227215	25227142	25227195	SNORD107	CD	HUGO	32073	SNRPN	SNORD107	RF01164	SNORD107	Small nucleolar RNA SNORD107		Eutherians
2230066	SNORD108	ILMN_1780508	SNORD108_ILMN_1780508	snoID_0267	chr15	+	25232072	25232140	25232072	25232143	SNORD108	CD	HUGO	28	SNURF-SNRPN	SNORD108	RF01158	SNORD108	Small nucleolar RNA SNORD108	low expression	NO
7100474	SNORD109A	ILMN_3245599	SNORD109A_ILMN_3245599	snoID_0187	chr15	+	25287121	25287187	25287122	25287187	SNORD109A	CD	HUGO	147032	RP11-701H24.10	SNORD109A	RF01278	SNORD109A	Small nucleolar RNA SNORD109A		Eutherians
2140484	SNORD109B	ILMN_1787980	SNORD109B_ILMN_1787980	snoID_0188	chr15	+	25523490	25523556	25523491	25523556	SNORD109B	CD	HUGO	145754	SNURF-SNRPN	SNORD109B	RF01278	SNORD109A	Small nucleolar RNA SNORD109A		Eutherians
6420068	SNORD11	ILMN_3237971	SNORD11_ILMN_3237971	snoID_0193	chr2	+	203157774	203157857	203157776	203157855	SNORD11	CD	HUGO	132508	NOP58	SNORD11	RF01182	SNORD11	Small nucleolar RNA SNORD11		Tetrapodes and Teleostes
1240273	SNORD110	ILMN_3235397	SNORD110_ILMN_3235397	snoID_0097	chr20	+	2634858	2634932	2634858	2634930	SNORD110	CD	HUGO	949869	NOP56	SNORD110	RF00610	SNORD110	Small nucleolar RNA SNORD110		Amniotes
7400332	SNORD111	ILMN_3237039	SNORD111_ILMN_3237039	snoID_0237	chr16	+	70571908	70572001	70571912	70571998	SNORD111	CD	HUGO	13877	SF3B3	SNORD111	RF00611	SNORD111	Small nucleolar RNA SNORD111		Amniotes
5420040	SNORD111B	ILMN_3241848	SNORD111B_ILMN_3241848	snoID_0105	chr16	+	70563402	70563502	70563416	70563488	SNORD111B	CD	HUGO	690461	SF3B3	SNORD111B	RF00611	SNORD111	Small nucleolar RNA SNORD111		Amniotes
5260528	SNORD112	ILMN_3238950	SNORD112_ILMN_3238950	snoID_0144	chr14	+	101364257	101364333	101364259	101364328	SNORD112	CD	HUGO	403647	MEG8	SNORD112	RF01169	SNORD112	Small nucleolar RNA SNORD112		Eutherians
6060647	SNORD113-1	ILMN_3309874	SNORD113-1_ILMN_3309874	snoID_0272	chr14	+	101391158	101391227	101391160	101391227	SNORD113-1	CD	HUGO	1	NA	SNORD113-1	RF00181	SNORD113	Small nucleolar RNA SNORD113/SNORD114 family	low expression	Eutherians
3990288	SNORD113-2	ILMN_3310905	SNORD113-2_ILMN_3310905	snoID_0271	chr14	+	101393679	101393749	101393681	101393748	SNORD113-2	CD	HUGO	2	NA	SNORD113-2	RF00181	SNORD113	Small nucleolar RNA SNORD113/SNORD114 family	low expression	Eutherians
3130685	SNORD113-3	ILMN_3310321	SNORD113-3_ILMN_3310321	snoID_0222	chr14	+	101396256	101396326	101396258	101396325	SNORD113-3	CD	HUGO	34202	NA	SNORD113-3	RF00181	SNORD113	Small nucleolar RNA SNORD113/SNORD114 family		Eutherians
4850053	SNORD113-4	ILMN_3310156	SNORD113-4_ILMN_3310156	snoID_0208	chr14	+	101402828	101402901	101402830	101402898	SNORD113-4	CD	HUGO	69059	NA	SNORD113-4	RF00181	SNORD113	Small nucleolar RNA SNORD113/SNORD114 family		Eutherians
1010669	SNORD113-5	ILMN_3308183	SNORD113-5_ILMN_3308183	snoID_0132	chr14	+	101404524	101404600	101404526	101404599	SNORD113-5	CD	HUGO	438806	NA	SNORD113-5	RF00181	SNORD113	Small nucleolar RNA SNORD113/SNORD114 family		Eutherians
6840504	SNORD113-6	ILMN_3309279	SNORD113-6_ILMN_3309279	snoID_0130	chr14	+	101405893	101405966	101405895	101405962	SNORD113-6	CD	HUGO	449514	NA	SNORD113-6	RF00181	SNORD113	Small nucleolar RNA SNORD113/SNORD114 family		Eutherians
610328	SNORD113-7	ILMN_3308555	SNORD113-7_ILMN_3308555	snoID_0101	chr14	+	101407463	101407538	101407466	101407534	SNORD113-7	CD	HUGO	810421	NA	SNORD113-7	RF00181	SNORD113	Small nucleolar RNA SNORD113/SNORD114 family		Eutherians
1450497	SNORD113-8	ILMN_3308275	SNORD113-8_ILMN_3308275	snoID_0059	chr14	+	101409788	101409860	101409790	101409856	SNORD113-8	CD	HUGO	2843856	NA	SNORD113-8	RF00181	SNORD113	Small nucleolar RNA SNORD113/SNORD114 family		Eutherians
6250161	SNORD113-9	ILMN_3309854	SNORD113-9_ILMN_3309854	snoID_0140	chr14	+	101411986	101412056	101411988	101412052	SNORD113-9	CD	HUGO	421163	NA	SNORD113-9	RF00181	SNORD113	Small nucleolar RNA SNORD113/SNORD114 family		Eutherians
2710687	SNORD114-1	ILMN_3308753	SNORD114-1_ILMN_3308753	snoID_0096	chr14	+	101416170	101416240	101416172	101416237	SNORD114-1	CD	HUGO	1034449	NA	SNORD114-1	RF00181	SNORD113	Small nucleolar RNA SNORD113/SNORD114 family		Eutherians
4260056	SNORD114-11	ILMN_3309036	SNORD114-11_ILMN_3309036	snoID_0129	chr14	+	101434448	101434521	101434450	101434520	SNORD114-11	CD	HUGO	449994	RP11-909M7.3	SNORD114-11	RF00181	SNORD113	Small nucleolar RNA SNORD113/SNORD114 family		Eutherians
3990446	SNORD114-13	ILMN_3311105	SNORD114-13_ILMN_3311105	snoID_0224	chr14	+	101436216	101436288	101436218	101436285	SNORD114-13	CD	HUGO	31332	RP11-909M7.3	SNORD114-13	RF00181	SNORD113	Small nucleolar RNA SNORD113/SNORD114 family		Eutherians
730309	SNORD114-17	ILMN_3309428	SNORD114-17_ILMN_3309428	snoID_0085	chr14	+	101441143	101441216	101441145	101441213	SNORD114-17	CD	HUGO	1299017	RP11-909M7.3	SNORD114-17	RF00181	SNORD113	Small nucleolar RNA SNORD113/SNORD114 family		Eutherians
5080189	SNORD114-19	ILMN_3309654	SNORD114-19_ILMN_3309654	snoID_0257	chr14	+	101442814	101442887	101442816	101442883	SNORD114-19	CD	HUGO	429	RP11-909M7.3	SNORD114-19	RF00181	SNORD113	Small nucleolar RNA SNORD113/SNORD114 family	low expression	Eutherians
150431	SNORD114-2	ILMN_3311085	SNORD114-2_ILMN_3311085	snoID_0265	chr14	+	101418193	101418269	101418195	101418268	SNORD114-2	CD	HUGO	37	NA	SNORD114-2	RF00181	SNORD113	Small nucleolar RNA SNORD113/SNORD114 family	low expression	Eutherians
6270097	SNORD114-24	ILMN_3308030	SNORD114-24_ILMN_3308030	snoID_0167	chr14	+	101451114	101451184	101451116	101451180	SNORD114-24	CD	HUGO	239354	RP11-909M7.3	SNORD114-24	RF00181	SNORD113	Small nucleolar RNA SNORD113/SNORD114 family		Eutherians
2320142	SNORD114-27	ILMN_3309334	SNORD114-27_ILMN_3309334	snoID_0250	chr14	+	101454498	101454566	101454500	101454562	SNORD114-27	CD	HUGO	1274	NA	SNORD114-27	RF00181	SNORD113	Small nucleolar RNA SNORD113/SNORD114 family		Eutherians
3060468	SNORD114-29	ILMN_3308375	SNORD114-29_ILMN_3308375	snoID_0243	chr14	+	101456428	101456496	101456430	101456495	SNORD114-29	CD	HUGO	7724	NA	SNORD114-29	RF00181	SNORD113	Small nucleolar RNA SNORD113/SNORD114 family		Eutherians
3140598	SNORD114-3	ILMN_3310416	SNORD114-3_ILMN_3310416	snoID_0214	chr14	+	101419686	101419759	101419688	101419758	SNORD114-3	CD	HUGO	58010	NA	SNORD114-3	RF00181	SNORD113	Small nucleolar RNA SNORD113/SNORD114 family		Eutherians
5860632	SNORD114-30	ILMN_3310050	SNORD114-30_ILMN_3310050	snoID_0262	chr14	+	101458256	101458326	101458258	101458325	SNORD114-30	CD	HUGO	90	NA	SNORD114-30	RF00181	SNORD113	Small nucleolar RNA SNORD113/SNORD114 family	low expression	Eutherians
5260463	SNORD114-31	ILMN_3310451	SNORD114-31_ILMN_3310451	snoID_0260	chr14	+	101459573	101459646	101459572	101459642	SNORD114-31	CD	HUGO	135	NA	SNORD114-31	RF00181	SNORD113	Small nucleolar RNA SNORD113/SNORD114 family	low expression	Eutherians
360112	SNORD114-4	ILMN_3309689	SNORD114-4_ILMN_3309689	snoID_0247	chr14	+	101420681	101420784	101420683	101420781	SNORD114-4	CD	HUGO	1496	NA	SNORD114-4	RF00181	SNORD113	Small nucleolar RNA SNORD113/SNORD114 family		Eutherians
150278	SNORD114-7	ILMN_3309458	SNORD114-7_ILMN_3309458	snoID_0269	chr14	+	101429391	101429466	101429393	101429465	SNORD114-7	CD	HUGO	16	AL132709.8	SNORD114-7	RF00181	SNORD113	Small nucleolar RNA SNORD113/SNORD114 family	low expression	Eutherians
3130204	SNORD114-8	ILMN_3308000	SNORD114-8_ILMN_3308000	snoID_0263	chr14	+	101431118	101431188	101431120	101431184	SNORD114-8	CD	HUGO	78	AL132709.8	SNORD114-8	RF00181	SNORD113	Small nucleolar RNA SNORD113/SNORD114 family	low expression	Eutherians
5900551	SNORD115-48	ILMN_3308113	SNORD115-48_ILMN_3308113	snoID_0231	chr15	+	25514930	25515005	25514931	25515005	SNORD115-48	CD	HUGO	20753	SNURF-SNRPN	SNORD115-48	RF00105	SNORD115	Small nucleolar RNA SNORD115		Eutherians
360072	SNORD116-13	ILMN_3308515	SNORD116-13_ILMN_3308515	snoID_0232	chr15	+	25324204	25324297	25324206	25324296	SNORD116-13	CD	HUGO	19808	SNURF-SNRPN	SNORD116-13	RF00108	SNORD116	Small nucleolar RNA SNORD116		Eutherians
5960184	SNORD116-2	ILMN_2107655	SNORD116-2_ILMN_2107655	snoID_0049	chr15	+	25299356	25299452	25299358	25299451	SNORD116-2	CD	HUGO	4146227	SNURF-SNRPN	SNORD116-2	RF00108	SNORD116	Small nucleolar RNA SNORD116		Eutherians
6100541	SNORD116-27	ILMN_3310745	SNORD116-27_ILMN_3310745	snoID_0186	chr15	+	25346721	25346814	25346723	25346813	SNORD116-27	CD	HUGO	147893	SNURF-SNRPN	SNORD116-27	RF00108	SNORD116	Small nucleolar RNA SNORD116		Eutherians
3460722	SNORD116-29	ILMN_3310593	SNORD116-29_ILMN_3310593	snoID_0218	chr15	+	25351667	25351751	25351669	25351750	SNORD116-29	CD	HUGO	51418	SNURF-SNRPN	SNORD116-29	RF00108	SNORD116	Small nucleolar RNA SNORD116		Eutherians
4610458	SNORD116-4	ILMN_2067520	SNORD116-4_ILMN_2067520	snoID_0052	chr15	+	25304684	25304781	25304686	25304780	SNORD116-4	CD	HUGO	3855217	SNHG14	SNORD116-4	RF00108	SNORD116	Small nucleolar RNA SNORD116		Eutherians
6270731	SNORD117	ILMN_3242908	SNORD117_ILMN_3242908	snoID_0099	chr6	-	31504151	31504226	31504225	31504151	SNORD117	CD	HUGO	855848	DDX39B	SNORD117	RF00137	SNORD83	Small nucleolar RNA SNORD83		Deuterostomes
1340373	SNORD119	ILMN_3245376	SNORD119_ILMN_3245376	snoID_0016	chr20	-	2443598	2443693	2443681	2443612	SNORD119	CD	HUGO	18167463	SNRPB	SNORD119	RF01164	SNORD107	Small nucleolar RNA SNORD107		Therians
7380523	SNORD11B	ILMN_3238478	SNORD11B_ILMN_3238478	snoID_0233	chr2	+	203156040	203156151	203156059	203156138	SNORD11B	CD	HUGO	19437	NOP58	SNORD11B	RF01192	SNORD11B	Small nucleolar RNA SNORD11B		Tetrapodes and Teleostes
7320278	SNORD12	ILMN_3236049	SNORD12_ILMN_3236049	snoID_0195	chr20	+	47897220	47897309	47897226	47897302	SNORD12	CD	HUGO	123918	ZFAS1	SNORD12	RF00581	SNORD12	Small nucleolar SNORD12/SNORD106		Deuterostomes
1940767	SNORD121A	ILMN_3246715	SNORD121A_ILMN_3246715	snoID_0211	chr9	-	33952762	33952852	33952841	33952776	SNORD121A	CD	HUGO	63342	UBAP2	SNORD121A	RF01191	SNORD121A	Small nucleolar RNA SNORD121A		Tetrapodes and Teleostes
1110725	SNORD121B	ILMN_3240682	SNORD121B_ILMN_3240682	snoID_0173	chr9	-	33934295	33934373	33934367	33934302	SNORD121B	CD	HUGO	217543	UBAP2	SNORD121B	RF01191	SNORD121A	Small nucleolar RNA SNORD121A		Tetrapodes and Teleostes
830286	SNORD123	ILMN_3238972	SNORD123_ILMN_3238972	snoID_0206	chr5	+	9548939	9549026	9548950	9549016	SNORD123	CD	HUGO	73633	SNHG18	SNORD123	RF01156	SNORD123	Small nucleolar RNA SNORD123		Vertebrates
5050685	SNORD124	ILMN_3235154	SNORD124_ILMN_3235154	snoID_0115	chr17	-	38183795	38183898	38183887	38183809	SNORD124	CD	HUGO	576741	MED24	SNORD124	RF01211	SNORD124	Small nucleolar RNA SNORD124		Therians
4480563	SNORD125	ILMN_3249543	SNORD125_ILMN_3249543	snoID_0199	chr22	-	29729152	29729247	29729234	29729165	SNORD125	CD	HUGO	104375	AP1B1	MIR3653	RF01200	SNORD125	Small nucleolar RNA SNORD125		Amniotes
4070687	SNORD126	ILMN_3236804	SNORD126_ILMN_3236804	snoID_0175	chr14	-	20794600	20794698	20794682	20794614	SNORD126	CD	HUGO	194477	CCNB1IP1	SNORD126	RF01168	SNORD126	Small nucleolar RNA SNORD126		Tetrapodes and Teleostes
2360204	SNORD127	ILMN_3242633	SNORD127_ILMN_3242633	snoID_0018	chr14	+	45580078	45580178	45580090	45580165	SNORD127	CD	HUGO	16828495	PRPF39	SNORD127	RF01186	SNORD127	Small nucleolar RNA SNORD127		Amniotes
5700634	SNORD12B	ILMN_3240002	SNORD12B_ILMN_3240002	snoID_0095	chr20	+	47896850	47896952	47896862	47896938	SNORD12B	CD	HUGO	1038539	ZFAS1	SNORD12B	RF00581	SNORD12	Small nucleolar SNORD12/SNORD106		Deuterostomes
1510228	SNORD12C	ILMN_3249286	SNORD12C_ILMN_3249286	snoID_0112	chr20	+	47895482	47895560	47895482	47895560	SNORD12C	CD	HUGO	600094	ZFAS1	SNORD12C	RF00581	SNORD12	Small nucleolar SNORD12/SNORD106		Deuterostomes
7210035	SNORD13	ILMN_1892403	SNORD13_ILMN_1892403	snoID_0009	chr8	+	33370993	33371096	33370992	33371096	SNORD13	CD	HUGO	43879915	NA	SNORD13	RF01210	snoU13	Small nucleolar RNA U13	cleavage of pre-rRNA & Regulation of chromatin structure	Vertebrates
5490458	SNORD14A	ILMN_1799381	SNORD14A_ILMN_1799381	snoID_0066	chr11	-	17096200	17096291	17096291	17096200	SNORD14A	CD	HUGO	2388854	RPS13	SNORD14A	RF00016	SNORD14	Small nucleolar RNA SNORD14		Deuterostomes
1940598	SNORD14B	ILMN_1707598	SNORD14B_ILMN_1707598	snoID_0064	chr11	-	17097325	17097415	17097415	17097325	SNORD14B	CD	HUGO	2431288	RPS13	SNORD14B	RF00016	SNORD14	Small nucleolar RNA SNORD14		Deuterostomes
5290543	SNORD15A	ILMN_1767869	SNORD15A_ILMN_1767869	snoID_0039	chr11	+	75111435	75111582	75111435	75111582	SNORD15A	CD	HUGO	4980558	RPS3	SNORD15A	RF00067	SNORD15	Small nucleolar RNA SNORD15	Regulation of chromatin structure & sdRNA with mi-RNA like capability	Vertebrates
2710719	SNORD15B	ILMN_1713832	SNORD15B_ILMN_1713832	snoID_0026	chr11	+	75115465	75115610	75115465	75115610	SNORD15B	CD	HUGO	7858324	RPS3	SNORD15B	RF00067	SNORD15	Small nucleolar RNA SNORD15	Regulation of chromatin structure	Vertebrates
1430427	SNORD16	ILMN_1669210	SNORD16_ILMN_1669210	snoID_0062	chr15	-	66795149	66795248	66795249	66795151	SNORD16	CD	HUGO	2571732	RPL4	SNORD16	RF00138	SNORD16	Small nucleolar RNA SNORD16		Deuterostomes
1430037	SNORD17	ILMN_3240781	SNORD17_ILMN_3240781	snoID_0081	chr20	-	17943353	17943589	17943589	17943355	SNORD17	CD	HUGO	1537516	SNX5	SNORD17	RF00567	SNORD17	Small nucleolar RNA SNORD17		Vertebrates
1340497	SNORD18A	ILMN_3237050	SNORD18A_ILMN_3237050	snoID_0092	chr15	-	66795583	66795652	66795651	66795583	SNORD18A	CD	HUGO	1123623	RPL4	SNORD18A	RF00093	SNORD18	Small nucleolar RNA SNORD18		Deuterostomes
4290373	SNORD18B	ILMN_1680179	SNORD18B_ILMN_1680179	snoID_0083	chr15	-	66794360	66794429	66794428	66794360	SNORD18B	CD	HUGO	1424798	RPL4	SNORD18B	RF00093	SNORD18	Small nucleolar RNA SNORD18		Deuterostomes
1240202	SNORD18C	ILMN_1721749	SNORD18C_ILMN_1721749	snoID_0093	chr15	-	66793590	66793656	66793655	66793590	SNORD18C	CD	HUGO	1117793	RPL4	SNORD18C	RF00093	SNORD18	Small nucleolar RNA SNORD18		Deuterostomes
1780035	SNORD19	ILMN_3243049	SNORD19_ILMN_3243049	snoID_0252	chr3	+	52723256	52723331	52723257	52723320	SNORD19	CD	HUGO	774	GNL3	SNORD19	RF00569	SNORD19	Small nucleolar RNA SNORD19	low expression	Tetrapodes and Teleostes
1780711	SNORD19B	ILMN_3236052	SNORD19B_ILMN_3236052	snoID_0125	chr3	+	52724754	52724846	52724768	52724833	SNORD19B	CD	HUGO	466766	GNL3	SNORD19B	RF01183	SNORD19B	Small nucleolar RNA SNORD19B		Tetrapodes and Teleostes
650209	SNORD1A	ILMN_3244281	SNORD1A_ILMN_3244281	snoID_0182	chr17	+	74557715	74557788	74557719	74557784	SNORD1A	CD	HUGO	160298	SNHG16	SNORD1A	RF00213	snoR38	Small nucleolar RNA R38		Tetrapodes
2370091	SNORD1B	ILMN_3245554	SNORD1B_ILMN_3245554	snoID_0057	chr17	+	74557190	74557275	74557195	74557264	SNORD1B	CD	HUGO	2920915	SNHG16	SNORD1B	RF00213	snoR38	Small nucleolar RNA R38		Tetrapodes
4220356	SNORD1C	ILMN_3246944	SNORD1C_ILMN_3246944	snoID_0113	chr17	+	74554872	74554951	74554876	74554948	SNORD1C	CD	HUGO	590049	SNHG16	SNORD1C	RF00213	snoR38	Small nucleolar RNA R38		Tetrapodes
4390482	SNORD2	ILMN_3237309	SNORD2_ILMN_3237309	snoID_0020	chr3	+	186502585	186502654	186502587	186502649	SNORD2	CD	HUGO	15337011	EIF4A2	SNORD2	RF01299	SNORD2	Small nucleolar RNA SNORD2	sdRNA with mi-RNA like capability	Vertebrates
240692	SNORD20	ILMN_3241738	SNORD20_ILMN_3241738	snoID_0145	chr2	-	232321155	232321234	232321234	232321157	SNORD20	CD	HUGO	392658	NCL	SNORD20	RF00217	SNORD20	Small nucleolar RNA SNORD20		Tetrapodes and Teleostes
5340170	SNORD21	ILMN_1774973	SNORD21_ILMN_1774973	snoID_0013	chr1	+	93302846	93302940	93302847	93302935	SNORD21	CD	HUGO	21310926	RPL5	SNORD21	RF00068	SNORD21	Small nucleolar RNA SNORD21		Tetrapodes and Teleostes
4260431	SNORD22	ILMN_1724884	SNORD22_ILMN_1724884	snoID_0137	chr11	-	62620382	62620507	62620508	62620384	SNORD22	CD	HUGO	423208	SNHG1	SNORD22	RF00099	SNORD22	Small nucleolar RNA SNORD22		Vertebrates
3170753	SNORD24	ILMN_3237251	SNORD24_ILMN_3237251	snoID_0047	chr9	+	136216251	136216325	136216251	136216324	SNORD24	CD	HUGO	4350046	RPL7A	SNORD24	RF00069	SNORD24	Small nucleolar RNA SNORD24		Vertebrates
7200082	SNORD25	ILMN_1784328	SNORD25_ILMN_1784328	snoID_0063	chr11	-	62623037	62623103	62623103	62623038	SNORD25	CD	HUGO	2550438	SNHG1	SNORD25	RF00054	SNORD25	Small nucleolar RNA SNORD25		Tetrapodes and Teleostes
6590408	SNORD26	ILMN_1691550	SNORD26_ILMN_1691550	snoID_0008	chr11	-	62622764	62622838	62622838	62622764	SNORD26	CD	HUGO	46741053	SNHG1	SNORD26	RF00087	SNORD26	Small nucleolar RNA SNORD26		Tetrapodes and Teleostes
1240246	SNORD27	ILMN_1755004	SNORD27_ILMN_1755004	snoID_0072	chr11	-	62622484	62622555	62622555	62622488	SNORD27	CD	HUGO	2044443	SNHG1	SNORD27	RF00086	SNORD27	Small nucleolar RNA SNORD27	sdRNA with mi-RNA like capability	Tetrapodes and Teleostes
3830196	SNORD28	ILMN_1656303	SNORD28_ILMN_1656303	snoID_0029	chr11	-	62622093	62622167	62622167	62622094	SNORD28	CD	HUGO	7481452	SNHG1	SNORD28	RF00085	SNORD28	Small nucleolar RNA SNORD28		Mammals
1400056	SNORD30	ILMN_1666599	SNORD30_ILMN_1666599	snoID_0040	chr11	-	62621135	62621204	62621204	62621138	SNORD30	CD	HUGO	4935173	SNHG1	SNORD30	RF00088	SNORD30	Small nucleolar RNA SNORD30		Tetrapodes and Teleostes
6660010	SNORD31	ILMN_2072391	SNORD31_ILMN_2072391	SnoID_0001	chr11	-	62620798	62620865	62620865	62620801	SNORD31	CD	HUGO	211623697	SNHG1	SNORD31	RF00089	SNORD31	Small nucleolar RNA SNORD31		Deuterostomes
3870358	SNORD32A	ILMN_1743217	SNORD32A_ILMN_1743217	snoID_0054	chr19	+	49993223	49993304	49993223	49993304	SNORD32A	CD	HUGO	3650065	RPL13A	SNORD32A	RF00133	SNORD33	Small nucleolar RNA Z195/SNORD33/SNORD32 family	Mediator of oxidative stress	Mammals
5810056	SNORD32B	ILMN_3247170	SNORD32B_ILMN_3247170	snoID_0249	chr6	+	29550029	29550105	29550029	29550108	SNORD32B	CD	HUGO	1449	NA	SNORD32B	RF00133	SNORD33	Small nucleolar RNA Z195/SNORD33/SNORD32 family		Mammals
830349	SNORD33	ILMN_1682354	SNORD33_ILMN_1682354	snoID_0148	chr19	+	49993874	49993956	49993873	49993954	SNORD33	CD	HUGO	359977	RPL13A	SNORD33	RF00133	SNORD33	Small nucleolar RNA Z195/SNORD33/SNORD32 family	Mediator of oxidative stress	Deuterostomes
3780050	SNORD34	ILMN_2165762	SNORD34_ILMN_2165762	snoID_0155	chr19	+	49994164	49994229	49994164	49994229	SNORD34	CD	HUGO	290702	RPL13A	SNORD34	RF00147	SNORD34	Small nucleolar RNA SNORD34		Eutherians
3840091	SNORD35A	ILMN_1667609	SNORD35A_ILMN_1667609	snoID_0077	chr19	+	49994432	49994517	49994433	49994512	SNORD35A	CD	HUGO	1797520	RPL13A	SNORD35A	RF00211	SNORD35	Small nucleolar RNA SNORD35	Mediator of oxidative stress	Vertebrates
3190561	SNORD35B	ILMN_1694367	SNORD35B_ILMN_1694367	snoID_0156	chr19	+	50000976	50001063	50000977	50001059	SNORD35B	CD	HUGO	290644	RPS11	SNORD35B	RF00211	SNORD35	Small nucleolar RNA SNORD35		Vertebrates
2750446	SNORD36A	ILMN_2135175	SNORD36A_ILMN_2135175	snoID_0152	chr9	+	136217311	136217382	136217311	136217380	SNORD36A	CD	HUGO	313043	RPL7A	SNORD36A	RF00049	SNORD36	Small nucleolar RNA SNORD36		Deuterostomes
1090386	SNORD36B	ILMN_3237044	SNORD36B_ILMN_3237044	snoID_0025	chr9	+	136216949	136217019	136216951	136217019	SNORD36B	CD	HUGO	8884880	RPL7A	SNORD36B	RF00049	SNORD36	Small nucleolar RNA SNORD36		Deuterostomes
10356	SNORD36C	ILMN_2160160	SNORD36C_ILMN_2160160	snoID_0089	chr9	+	136217701	136217768	136217702	136217765	SNORD36C	CD	HUGO	1204844	RPL7A	SNORD36C	RF00049	SNORD36	Small nucleolar RNA SNORD36		Deuterostomes
6980259	SNORD37	ILMN_3240595	SNORD37_ILMN_3240595	snoID_0012	chr19	-	3982505	3982570	3982570	3982505	SNORD37	CD	HUGO	23752321	EEF2	SNORD37	RF00440	SNORD37	Small nucleolar RNA SNORD37		Amniotes
830575	SNORD38A	ILMN_1684278	SNORD38A_ILMN_1684278	snoID_0002	chr1	+	45243514	45243584	45243515	45243582	SNORD38A	CD	HUGO	184203407	RPS8	SNORD38A	RF00212	SNORD38	Small nucleolar RNA SNORD38		Vertebrates
5360341	SNORD38B	ILMN_1741944	SNORD38B_ILMN_1741944	snoID_0019	chr1	+	45244062	45244130	45244062	45244127	SNORD38B	CD	HUGO	15802853	RPS8	SNORD38B	RF00212	SNORD38	Small nucleolar RNA SNORD38		Vertebrates
2510164	SNORD3A	ILMN_3239574	SNORD3A_ILMN_3239574	snoID_0273	chr17	+	19091329	19091544	19091329	19091544	SNORD3A	CD	HUGO	685138863	NA	SNORD3A	RF00012	U3	Small nucleolar RNA U3	cleavage of pre-rRNA	NA
580161	SNORD3C	ILMN_3241034	SNORD3C_ILMN_3241034	snoID_0274	chr17	-	19093343	19093558	19093558	19093343	SNORD3C	CD	HUGO	441200991	NA	SNORD3C	RF00012	U3	Small nucleolar RNA U3	cleavage of pre-rRNA	NA
380685	SNORD3D	ILMN_3242315	SNORD3D_ILMN_3242315	snoID_0277	chr17	-	19015734	19015949	19015949	19015733	SNORD3D	CD	HUGO	21878810	NA	SNORD3D	RF00012	U3	Small nucleolar RNA U3	cleavage of pre-rRNA	NA
2190647	SNORD41	ILMN_3245549	SNORD41_ILMN_3245549	snoID_0212	chr19	-	12817263	12817332	12817331	12817265	SNORD41	CD	HUGO	61142	TNPO2	SNORD41	RF00588	SNORD41	Small nucleolar RNA SNORD41		Eutherians
2320370	SNORD42A	ILMN_1668661	SNORD42A_ILMN_1668661	snoID_0180	chr17	+	27050448	27050509	27050449	27050507	SNORD42A	CD	HUGO	165271	RPL23A	SNORD42A	RF00150	SNORD42	Small nucleolar RNA SNORD42		Tetrapodes and Teleostes
1410725	SNORD42B	ILMN_1810762	SNORD42B_ILMN_1810762	snoID_0028	chr17	+	27047568	27047634	27047569	27047634	SNORD42B	CD	HUGO	7484725	RPL23A	SNORD42B	RF00150	SNORD42	Small nucleolar RNA SNORD42		Tetrapodes and Teleostes
4010008	SNORD43	ILMN_1739086	SNORD43_ILMN_1739086	snoID_0037	chr22	-	39715057	39715118	39715118	39715057	SNORD43	CD	HUGO	6417024	RPL3	SNORD43	RF00221	SNORD43	Small nucleolar RNA SNORD43		Deuterostomes
5550189	SNORD44	ILMN_3240848	SNORD44_ILMN_3240848	snoID_0005	chr1	-	173835106	173835166	173835166	173835106	SNORD44	CD	HUGO	92509210	GAS5	SNORD44	RF00287	SNORD44	Small nucleolar RNA SNORD44		Tetrapodes and Teleostes
3390113	SNORD45A	ILMN_3242525	SNORD45A_ILMN_3242525	snoID_0100	chr1	+	76253574	76253657	76253574	76253655	SNORD45A	CD	HUGO	822625	RABGGTB	SNORD45A	RF00279	SNORD45	Small nucleolar RNA SNORD45		Tetrapodes and Teleostes
6330273	SNORD45B	ILMN_3240576	SNORD45B_ILMN_3240576	snoID_0192	chr1	+	76255162	76255232	76255162	76255232	SNORD45B	CD	HUGO	133369	RABGGTB	SNORD45B	RF00279	SNORD45	Small nucleolar RNA SNORD45		Tetrapodes and Teleostes
1820678	SNORD45C	ILMN_3236110	SNORD45C_ILMN_3236110	snoID_0183	chr1	+	76252757	76252834	76252757	76252834	SNORD45C	CD	HUGO	154845	RABGGTB	SNORD45C	RF00279	SNORD45	Small nucleolar RNA SNORD45		Tetrapodes and Teleostes
4210044	SNORD46	ILMN_1682402	SNORD46_ILMN_1682402	snoID_0194	chr1	+	45242164	45242261	45242165	45242261	SNORD46	CD	HUGO	127151	RPS8	SNORD46	RF00218	SNORD46	Small nucleolar RNA SNORD46		Vertebrates
4730102	SNORD47	ILMN_3236650	SNORD47_ILMN_3236650	snoID_0143	chr1	-	173833507	173833583	173833583	173833507	SNORD47	CD	HUGO	412057	GAS5	SNORD47	RF00281	SNORD47	Small nucleolar RNA SNORD47		Tetrapodes and Teleostes
3190382	SNORD48	ILMN_2157020	SNORD48_ILMN_2157020	snoID_0046	chr6	+	31803040	31803103	31803040	31803103	SNORD48	CD	HUGO	4662197	C6orf48	SNORD48	RF00282	SNORD48	Small nucleolar RNA SNORD48		Tetrapodes and Teleostes
1240324	SNORD49A	ILMN_3248562	SNORD49A_ILMN_3248562	snoID_0090	chr17	+	16343350	16343420	16343350	16343420	SNORD49A	CD	HUGO	1164007	C17orf76-AS1	SNORD49A	RF00277	SNORD49	Small nucleolar RNA SNORD49		Vertebrates
4490048	SNORD4A	ILMN_1716441	SNORD4A_ILMN_1716441	snoID_0058	chr17	+	27049600	27049671	27049602	27049670	SNORD4A	CD	HUGO	2877721	RPL23A	SNORD4A	RF00266	snoZ17	Small nucleolar RNA Z17		Amniotes
2140086	SNORD4B	ILMN_1720794	SNORD4B_ILMN_1720794	snoID_0170	chr17	+	27050699	27050772	27050702	27050766	SNORD4B	CD	HUGO	231400	RPL23A	SNORD4B	RF00266	snoZ17	Small nucleolar RNA Z17		Amniotes
5690470	SNORD5	ILMN_3237236	SNORD5_ILMN_3237236	snoID_0126	chr11	-	93466394	93466466	93466465	93466398	SNORD5	CD	HUGO	466227	TAF1D	SNORD5	RF01161	SNORD5	Small nucleolar RNA SNORD5		Amniotes
2750136	SNORD50A	ILMN_3308788	SNORD50A_ILMN_3308788	snoID_0015	chr6	-	86387012	86387086	86387086	86387010	SNORD50A	CD	HUGO	18848461	SNHG5	SNORD50A	RF00278	SNORD50	Small nucleolar RNA SNORD50	Regulation of chromatin structure	Tetrapodes and Teleostes
460246	SNORD50B	ILMN_3247444	SNORD50B_ILMN_3247444	snoID_0067	chr6	-	86387307	86387377	86387376	86387306	SNORD50B	CD	HUGO	2320856	SNHG5	SNORD50B	RF00278	SNORD50	Small nucleolar RNA SNORD50	Regulation of chromatin structure	Tetrapodes and Teleostes
6860605	SNORD51	ILMN_3240306	SNORD51_ILMN_3240306	snoID_0035	chr2	+	207026605	207026674	207026606	207026674	SNORD51	CD	HUGO	6575150	EEF1B2	SNORD51	RF00280	SNORD51	Small nucleolar RNA SNORD51		Amniotes
6840326	SNORD52	ILMN_3246391	SNORD52_ILMN_3246391	snoID_0033	chr6	+	31804853	31804916	31804852	31804918	SNORD52	CD	HUGO	6665262	C6orf48	SNORD52	RF00276	SNORD52	Small nucleolar RNA SNORD52		Tetrapodes and Teleostes
5910053	SNORD53	ILMN_3245541	SNORD53_ILMN_3245541	snoID_0210	chr2	+	29149933	29150010	29149933	29150010	SNORD53	CD	HUGO	64283	WDR43	SNORD53	RF00325	SNORD53_SNORD92	Small nucleolar RNA SNORD53/SNORD92		Tetrapodes and Teleostes
6960110	SNORD54	ILMN_1663681	SNORD54_ILMN_1663681	snoID_0116	chr8	-	56986398	56986460	56986460	56986398	SNORD54	CD	HUGO	567172	RPS20	SNORD54	RF01277	snoU54	Small nucleolar RNA U54		Amniotes
4180408	SNORD55	ILMN_1680393	SNORD55_ILMN_1680393	snoID_0102	chr1	+	45241537	45241610	45241537	45241610	SNORD55	CD	HUGO	786435	RPS8	SNORD55	RF00157	SNORD39	Small nucleolar RNA SNORD55/SNORD39		Amniotes
2450020	SNORD56	ILMN_2209515	SNORD56_ILMN_2209515	snoID_0074	chr20	+	2637270	2637340	2637270	2637339	SNORD56	CD	HUGO	1882271	NOP56	SNORD56	RF00275	SNORD56	Small nucleolar RNA SNORD56		Tetrapodes and Teleostes
1400767	SNORD56B	ILMN_1715396	SNORD56B_ILMN_1715396	snoID_0264	chr14	+	71865054	71865124	71865056	71865126	SNORD56B	CD	HUGO	53	NA	SNORD56B	RF00275	SNORD56	Small nucleolar RNA SNORD56	low expression	NA
5310463	SNORD57	ILMN_3241139	SNORD57_ILMN_3241139	snoID_0166	chr20	+	2637585	2637656	2637585	2637656	SNORD57	CD	HUGO	255091	NOP56	SNORD57	RF00274	SNORD57	Small nucleolar RNA SNORD57		Amniotes
2510274	SNORD58A	ILMN_3236149	SNORD58A_ILMN_3236149	snoID_0078	chr18	-	47017653	47017717	47017717	47017653	SNORD58A	CD	HUGO	1797396	RPL17-C18orf32	SNORD58A	RF00151	SNORD58	Small nucleolar RNA SNORD58		Vertebrates
150326	SNORD58B	ILMN_3238028	SNORD58B_ILMN_3238028	snoID_0171	chr18	-	47018034	47018099	47018099	47018035	SNORD58B	CD	HUGO	222342	RPL17-C18orf32	SNORD58B	RF00151	SNORD58	Small nucleolar RNA SNORD58		Vertebrates
830471	SNORD58C	ILMN_3239634	SNORD58C_ILMN_3239634	snoID_0043	chr18	-	47015605	47015694	47015678	47015618	SNORD58C	CD	HUGO	4816385	RPL17-C18orf32	SNORD58C	RF00151	SNORD58	Small nucleolar RNA SNORD58		Vertebrates
5890551	SNORD59A	ILMN_3239851	SNORD59A_ILMN_3239851	snoID_0034	chr12	-	57038811	57038885	57038884	57038811	SNORD59A	CD	HUGO	6600228	ATP5B	SNORD59A	RF00273	SNORD59	Small nucleolar RNA SNORD59		Tetrapodes and Teleostes
5910687	SNORD59B	ILMN_3242164	SNORD59B_ILMN_3242164	snoID_0038	chr12	-	57037464	57037538	57037533	57037468	SNORD59B	CD	HUGO	4992053	ATP5B	SNORD59B	RF00273	SNORD59	Small nucleolar RNA SNORD59		Tetrapodes and Teleostes
290220	SNORD6	ILMN_3234756	SNORD6_ILMN_3234756	snoID_0050	chr11	-	93464669	93464739	93464738	93464672	SNORD6	CD	HUGO	4091103	TAF1D	SNORD6	RF00342	snoZ40	Small nucleolar RNA Z40		Vertebrates
1190398	SNORD60	ILMN_3238481	SNORD60_ILMN_3238481	snoID_0075	chr16	-	2205024	2205106	2205106	2205027	SNORD60	CD	HUGO	1856467	RP11-304L19.5	SNORD60	RF00271	SNORD60	Small nucleolar RNA SNORD60	Involved in cholesterol trafficking to endoplasmatic reticulum	Tetrapodes and Teleostes
6130092	SNORD61	ILMN_3237439	SNORD61_ILMN_3237439	snoID_0109	chrX	-	135961358	135961430	135961432	135961359	SNORD61	CD	HUGO	646532	RBMX	SNORD61	RF00270	SNORD61	Small nucleolar RNA SNORD61		Deuterostomes
4640279	SNORD62B	ILMN_3248270	SNORD62B_ILMN_3248270	snoID_0108	chr9	+	134365873	134365958	134365873	134365959	SNORD62B	CD	HUGO	648884	PRRC2B	SNORD62B	RF00153	SNORD62	Small nucleolar RNA SNORD62		Amniotes
1510328	SNORD63	ILMN_3248394	SNORD63_ILMN_3248394	snoID_0070	chr5	-	137896732	137896799	137896799	137896733	SNORD63	CD	HUGO	2146497	HSPA9	SNORD63	RF00154	SNORD63	Small nucleolar RNA SNORD63		Amniotes
4070731	SNORD64	ILMN_1735689	SNORD64_ILMN_1735689	snoID_0014	chr15	+	25230247	25230313	25230249	25230310	SNORD64	CD	HUGO	20488201	SNURF-SNRPN	SNORD64	RF00570	SNORD64	Small Nucleolar RNA SNORD64		Eutherians
1440072	SNORD65	ILMN_3246353	SNORD65_ILMN_3246353	snoID_0003	chr17	+	16344540	16344612	16344538	16344612	SNORD65	CD	HUGO	175648163	C17orf76-AS1	SNORD65	RF00571	SNORD65	Small nucleolar RNA SNORD65		Vertebrates
3460202	SNORD66	ILMN_3247671	SNORD66_ILMN_3247671	snoID_0080	chr3	+	184043484	184043559	184043484	184043557	SNORD66	CD	HUGO	1644151	EIF4G1	SNORD66	RF00572	SNORD66	Small nucleolar RNA SNORD66	sdRNA with mi-RNA like capability	Tetrapodes and Teleostes
1340164	SNORD67	ILMN_3248712	SNORD67_ILMN_3248712	snoID_0106	chr11	-	46783939	46784049	46784046	46783940	SNORD67	CD	HUGO	688264	CKAP5	SNORD67	RF00573	SNORD67	Small nucleolar RNA SNORD67		Deuterostomes
1980669	SNORD68	ILMN_2082762	SNORD68_ILMN_2082762	snoID_0107	chr16	+	89627838	89627909	89627837	89627909	SNORD68	CD	HUGO	653821	RPL13	SNORD68	RF00324	snoMBII-202	Small nucleolar RNA MBII-202		Vertebrates
5130348	SNORD69	ILMN_3309694	SNORD69_ILMN_3309694	snoID_0084	chr3	+	52726752	52726828	52726760	52726820	SNORD69	CD	HUGO	1395381	GNL3	SNORD69	RF00574	SNORD69	Small nucleolar RNA SNORD69		Amniotes
7560678	SNORD7	ILMN_3236404	SNORD7_ILMN_3236404	snoID_0209	chr17	+	33900676	33900772	33900676	33900770	SNORD7	CD	HUGO	64462	RP11-1094M14.11	SNORD7	RF00288	snoZ30	Z30 small nucleolar RNA		Deuterostomes
6590202	SNORD70	ILMN_3237685	SNORD70_ILMN_3237685	snoID_0154	chr2	+	203141154	203141241	203141162	203141232	SNORD70	CD	HUGO	294293	NOP58	SNORD70	RF00575	SNORD70	Small nucleolar RNA SNORD70		Deuterostomes
20543	SNORD71	ILMN_3239272	SNORD71_ILMN_3239272	snoID_0056	chr16	-	71792305	71792390	71792385	71792313	SNORD71	CD	HUGO	3099254	AP1G1	SNORD71	RF00576	SNORD71	Small nucleolar RNA SNORD71		Amniotes
2640754	SNORD72	ILMN_3243450	SNORD72_ILMN_3243450	snoID_0202	chr5	-	40832758	40832837	40832834	40832765	SNORD72	CD	HUGO	81107	RPL37	SNORD72	RF00577	SNORD72	Small nucleolar RNA SNORD72		Tetrapodes and Teleostes
3870519	SNORD73A	ILMN_1667288	SNORD73A_ILMN_1667288	snoID_0189	chr4	+	152024979	152025043	152024980	152025041	SNORD73A	CD	HUGO	134843	RPS3A	SNORD73A	RF00071	SNORD73	Small nucleolar RNA SNORD73		Tetrapodes and Teleostes
4390044	SNORD74	ILMN_3246754	SNORD74_ILMN_3246754	snoID_0031	chr1	-	173836812	173836883	173836881	173836815	SNORD74	CD	HUGO	6982231	GAS5	SNORD74	RF00284	SNORD74	Small nucleolar RNA SNORD74	sdRNA with mi-RNA like capability	Tetrapodes and Teleostes
2750474	SNORD76	ILMN_3247148	SNORD76_ILMN_3247148	snoID_0006	chr1	-	173835773	173835853	173835851	173835774	SNORD76	CD	HUGO	85151249	GAS5	SNORD76	RF00069	SNORD24	Small nucleolar RNA SNORD24		Vertebrates
6330592	SNORD77	ILMN_3248294	SNORD77_ILMN_3248294	snoID_0061	chr1	-	173835441	173835509	173835506	173835444	SNORD77	CD	HUGO	2577300	GAS5	SNORD77	RF00591	SNORD77	Small nucleolar RNA SNORD77		Mammals
2490523	SNORD78	ILMN_3249211	SNORD78_ILMN_3249211	snoID_0004	chr1	-	173834761	173834824	173834823	173834762	SNORD78	CD	HUGO	152089963	GAS5	SNORD78	RF00592	SNORD78	Small nucleolar RNA SNORD78	sdRNA with mi-RNA like capability	Tetrapodes and Teleostes
2850040	SNORD79	ILMN_3241793	SNORD79_ILMN_3241793	snoID_0007	chr1	-	173834488	173834568	173834567	173834488	SNORD79	CD	HUGO	53384564	GAS5	SNORD79	RF00152	SNORD79	Small nucleolar RNA SNORD79		Tetrapodes and Teleostes
540520	SNORD8	ILMN_3248874	SNORD8_ILMN_3248874	snoID_0157	chr14	-	21865452	21865560	21865560	21865451	SNORD8	CD	HUGO	277140	CHD8	SNORD8	RF00377	snoU6-53	Small nucleolar RNA U6-53/MBII-28		Deuterostomes
630187	SNORD80	ILMN_3243244	SNORD80_ILMN_3243244	snoID_0041	chr1	-	173833971	173834041	173834042	173833971	SNORD80	CD	HUGO	4859473	GAS5	SNORD80	RF00309	snosnR60_Z15	Small nucleolar RNA snR60/Z15/Z230/Z193/J17		Tetrapodes and Teleostes
6580446	SNORD83A	ILMN_1653927	SNORD83A_ILMN_1653927	snoID_0010	chr22	-	39711218	39711312	39711309	39711221	SNORD83A	CD	HUGO	32545204	RPL3	SNORD83A	RF00593	snoU83B	Small nucleolar RNA U83B	sdRNA with mi-RNA like capability	Deuterostomes
3450630	SNORD83B	ILMN_3244157	SNORD83B_ILMN_3244157	snoID_0114	chr22	-	39709824	39709916	39709913	39709827	SNORD83B	CD	HUGO	589591	RPL3	SNORD83B	RF00593	snoU83B	Small nucleolar RNA U83B		Deuterostomes
4540544	SNORD84	ILMN_3245672	SNORD84_ILMN_3245672	snoID_0176	chr6	-	31508878	31508955	31508955	31508878	SNORD84	CD	HUGO	194465	DDX39B	SNORD84	RF00137	SNORD83	Small nucleolar RNA SNORD83		Deuterostomes
6590630	SNORD85	ILMN_3247303	SNORD85_ILMN_3247303	snoID_0146	chr1	-	31441010	31441084	31441081	31441014	SNORD85	CD	HUGO	389507	PUM1	SNORD85	RF00188	SNORD103	Small nucleolar RNA SNORD103/SNORD85		Vertebrates
3520170	SNORD87	ILMN_3243248	SNORD87_ILMN_3243248	snoID_0051	chr8	-	67834709	67834784	67834785	67834710	SNORD87	CD	HUGO	3997987	SNHG6	SNORD87	RF00439	SNORD87	Small nucleolar RNA SNORD87		Amniotes
1500598	SNORD88B	ILMN_3236097	SNORD88B_ILMN_3236097	snoID_0244	chr19	-	51302286	51302382	51302376	51302291	SNORD88B	CD	HUGO	5607	C19orf48	SNORD88B	RF00604	SNORD88	Small nucleolar RNA SNORD88		Amniotes
6620047	SNORD88C	ILMN_3237615	SNORD88C_ILMN_3237615	snoID_0165	chr19	-	51305582	51305678	51305672	51305590	SNORD88C	CD	HUGO	261696	C19orf48	SNORD88C	RF00604	SNORD88	Small nucleolar RNA SNORD88	M-box: complementary to several pre-mRNA intron-portions ﻗ°ﻸﺃ▒ﺃ، effecting isoform expression	Amniotes
5810411	SNORD89	ILMN_3238662	SNORD89_ILMN_3238662	snoID_0215	chr2	-	101889398	101889511	101889508	101889401	SNORD89	CD	HUGO	55509	RNF149	SNORD89	RF00578	SNORD89	Small nucleolar RNA SNORD89		Deuterostomes
1510021	SNORD9	ILMN_3244449	SNORD9_ILMN_3244449	snoID_0119	chr14	-	21860310	21860412	21860413	21860309	SNORD9	CD	HUGO	507652	CHD8	SNORD9	RF00377	snoU6-53	Small nucleolar RNA U6-53/MBII-28		Deuterostomes
3360176	SNORD90	ILMN_3240108	SNORD90_ILMN_3240108	snoID_0118	chr9	-	125642492	125642598	125642585	125642504	SNORD90	CD	HUGO	519266	RC3H2	SNORD90	RF00579	SNORD90	Small nucleolar RNA SNORD90		Amniotes
3870156	SNORD91A	ILMN_3241369	SNORD91A_ILMN_3241369	snoID_0177	chr17	-	2233573	2233664	2233658	2233579	SNORD91A	CD	HUGO	192068	TSR1	SNORD91A	RF00580	SNORD91	Small nucleolar RNA SNORD91 family		Tetrapodes and Teleostes
870504	SNORD91B	ILMN_3242443	SNORD91B_ILMN_3242443	snoID_0226	chr17	-	2232419	2232504	2232501	2232421	SNORD91B	CD	HUGO	24811	TSR1	SNORD91B	RF00580	SNORD91	Small nucleolar RNA SNORD91 family		Tetrapodes and Teleostes
4070703	SNORD92	ILMN_3245759	SNORD92_ILMN_3245759	snoID_0227	chr2	+	29136528	29136616	29136530	29136615	SNORD92	CD	HUGO	24130	WDR43	SNORD92	RF00325	SNORD53_SNORD92	Small nucleolar RNA SNORD53/SNORD92		Vertebrates
3990451	SNORD93	ILMN_3246529	SNORD93_ILMN_3246529	snoID_0151	chr7	+	22896232	22896305	22896232	22896304	SNORD93	CD	HUGO	321275	AC005682.5	SNORD93	RF00606	SNORD93	Small nucleolar RNA SNORD93	sdRNA with mi-RNA like capability	Mammals
5810520	SNORD94	ILMN_3245274	SNORD94_ILMN_3245274	snoID_0181	chr2	+	86362993	86363129	86362994	86363129	SNORD94	CD	HUGO	163879	PTCD3	SNORD94	RF00613	SNORD94	Small nucleolar RNA SNORD94		Vertebrates
6400592	SNORD95	ILMN_3243452	SNORD95_ILMN_3243452	snoID_0044	chr5	-	180670314	180670376	180670378	180670314	SNORD95	CD	HUGO	4791191	GNB2L1	SNORD95	RF00189	SNORD95	Small nucleolar RNA SNORD95		Amniotes
6510327	SNORD96A	ILMN_3244640	SNORD96A_ILMN_3244640	snoID_0048	chr5	-	180668818	180668889	180668890	180668817	SNORD96A	CD	HUGO	4227173	GNB2L1	SNORD96A	RF00055	SNORD96	Small nucleolar RNA SNORD96 family		Amniotes
6380491	SNORD96B	ILMN_3247008	SNORD96B_ILMN_3247008	snoID_0242	chrX	-	109468217	109468288	109468289	109468218	SNORD96B	CD	HUGO	8596	AMMECR1	SNORD96B	RF00055	SNORD96	Small nucleolar RNA SNORD96 family		Amniotes
510040	SNORD97	ILMN_3242144	SNORD97_ILMN_3242144	snoID_0121	chr11	-	10823014	10823155	10823153	10823016	SNORD97	CD	HUGO	490813	EIF4G2	SNORD97	RF01291	SNORD97	Small nucleolar RNA SNORD97	Regulation of chromatin structure	Amniotes
2360041	SNORD98	ILMN_3247625	SNORD98_ILMN_3247625	snoID_0158	chr10	+	70514929	70514995	70514929	70514993	SNORD98	CD	HUGO	268857	CCAR1	SNORD98	RF00607	SNORD98	Small nucleolar RNA SNORD98		Amniotes
1850273	SNORD99	ILMN_3248703	SNORD99_ILMN_3248703	snoID_0087	chr1	-	28905255	28905334	28905332	28905265	SNORD99	CD	HUGO	1277400	SNHG12	SNORD99	RF00608	SNORD99	Small nucleolar RNA SNORD99		Amniotes

## Sheet: B_Differential_Analysis_Results
				Resistant vs CTR (log2FC)			DOX treatment (log2FC)				Resistant vs CTR (p-value)			DOX treatment (p-value)
ID	Symbol	Probe ID	U2OS	DX30	DX100	DX580	U2OS	DX30	DX100	DX580	DX30	DX100	DX580	U2OS	DX30	DX100	DX580
580161	SNORD3C	ILMN_3241034	SNORD3C_ILMN_3241034	0.98	1.02	1.06	4.52	4.06	0.07	-0.69	0.368	0.351	0.335	3.17e-05	0.000852	0.854	0.488
2750523	SNORA9	ILMN_3235969	SNORA9_ILMN_3235969	0.98	0.75	0.17	4.06	3.82	0.87	1.04	0.00966	0.0291	0.546	0.000156	3.53e-07	0.0783	0.259
2510164	SNORD3A	ILMN_3239574	SNORD3A_ILMN_3239574	0.78	0.93	0.8	4.03	3.93	0.07	-0.51	0.404	0.33	0.393	4.8e-05	0.000487	0.775	0.566
1780008	SNORA28	ILMN_3235096	SNORA28_ILMN_3235096	0.76	0.64	0.59	4.18	4.33	0.87	-0.09	0.105	0.156	0.188	3.55e-05	8.22e-06	0.0243	0.833
2260524	SNORA5A	ILMN_3236942	SNORA5A_ILMN_3236942	0.76	0.11	-0.17	1.19	1.45	0.66	1.19	0.113	0.794	0.696	0.0182	0.0586	0.258	0.22
380685	SNORD3D	ILMN_3242315	SNORD3D_ILMN_3242315	0.72	0.72	0.78	4	3.74	0.2	-0.68	0.499	0.499	0.466	4.14e-05	0.000917	0.619	0.513
6960438	SNORA42	ILMN_3248575	SNORA42_ILMN_3248575	0.64	0.44	-0.09	4.21	4.32	0.75	0.11	0.137	0.289	0.82	1.19e-05	2.37e-06	0.244	0.793
6420647	SNORA27	ILMN_3248811	SNORA27_ILMN_3248811	0.62	-0.28	-0.44	0.11	0.35	0.43	0.77	0.31	0.64	0.465	0.842	0.397	0.499	0.312
4200711	SNORA63	ILMN_3249167	SNORA63_ILMN_3249167	0.57	0.05	-0.11	3.82	4.08	0.85	-0.21	0.349	0.93	0.854	0.000107	8.64e-06	0.116	0.805
6330138	SNORA22	ILMN_3246713	SNORA22_ILMN_3246713	0.56	0.98	0.3	1.42	2.04	-0.11	0.37	0.284	0.084	0.552	0.0227	0.000304	0.82	0.502
1510228	SNORD12C	ILMN_3249286	SNORD12C_ILMN_3249286	0.54	0.66	0.22	-0.46	-0.4	-0.92	-0.26	0.436	0.346	0.739	0.293	0.227	0.0672	0.535
7380523	SNORD11B	ILMN_3238478	SNORD11B_ILMN_3238478	0.5	0.64	0.38	0.89	0.57	-0.26	-0.08	0.104	0.048	0.189	0.00176	0.023	0.248	0.764
5690670	SNORA14B	ILMN_3241140	SNORA14B_ILMN_3241140	0.5	0.46	0.32	1.56	1.28	-0.17	0.4	0.277	0.312	0.467	0.00049	0.000822	0.574	0.589
6510433	SNORA33	ILMN_2096747	SNORA33_ILMN_2096747	0.5	0.16	-0.18	0.2	0.45	0.02	0.76	0.0152	0.318	0.262	0.295	0.0388	0.893	0.174
1240324	SNORD49A	ILMN_3248562	SNORD49A_ILMN_3248562	0.49	0.34	-0.08	2.5	2.06	-0.06	0.2	0.196	0.355	0.812	3.73e-07	0.00194	0.841	0.346
4540544	SNORD84	ILMN_3245672	SNORD84_ILMN_3245672	0.49	0.32	0.59	2.22	2.42	0.19	-0.19	0.329	0.513	0.246	1.31e-05	0.00438	0.498	0.614
6620039	SNORA73B	ILMN_3243677	SNORA73B_ILMN_3243677	0.48	0.09	-0.61	0.81	0.41	0.15	0.45	0.105	0.738	0.051	0.0289	0.233	0.707	0.12
4010008	SNORD43	ILMN_1739086	SNORD43_ILMN_1739086	0.47	0.24	0.53	3.17	3.02	0.7	-0.17	0.179	0.464	0.135	1.92e-06	0.000549	0.0172	0.71
2690619	SNORA45	ILMN_3238078	SNORA45_ILMN_3238078	0.47	0.24	-0.4	0.39	0.41	-0.47	0.29	0.449	0.7	0.523	0.323	0.375	0.242	0.627
1240577	SNORA67	ILMN_3247018	SNORA67_ILMN_3247018	0.46	-0.01	-0.22	3.53	3.45	0.73	0.05	0.372	0.986	0.656	1.52e-06	2.72e-06	0.258	0.94
5310463	SNORD57	ILMN_3241139	SNORD57_ILMN_3241139	0.46	-0.04	-0.18	1.23	0.74	-0.26	0.01	0.186	0.906	0.578	7.03e-05	0.0607	0.259	0.991
110576	SNORA23	ILMN_3247939	SNORA23_ILMN_3247939	0.45	-0.5	-0.62	3.84	4.27	1.2	1.04	0.376	0.324	0.233	0.0005	7.47e-05	0.0621	0.233
6980653	SNORA6	ILMN_3245365	SNORA6_ILMN_3245365	0.43	0.17	-0.37	3.46	3.41	0.36	0.06	0.172	0.562	0.227	3.15e-05	3.1e-05	0.492	0.911
1850273	SNORD99	ILMN_3248703	SNORD99_ILMN_3248703	0.42	0.98	0.34	0.56	0.26	-0.43	0.36	0.401	0.0793	0.489	0.0987	0.596	0.15	0.444
4180408	SNORD55	ILMN_1680393	SNORD55_ILMN_1680393	0.42	0.8	0.24	3.06	3.21	-0.18	0.35	0.0619	0.00473	0.242	4.64e-06	5.03e-07	0.528	0.498
6980594	SNORA59B	ILMN_3247251	SNORA59B_ILMN_3247251	0.42	0.18	0.5	0.46	-0.15	0.01	-0.54	0.475	0.747	0.394	0.0609	0.526	0.961	0.301
4850711	SNORA57	ILMN_3235404	SNORA57_ILMN_3235404	0.41	0.3	-0.17	2.49	2.34	-0.18	0.3	0.34	0.477	0.687	0.000237	9.62e-05	0.661	0.55
2710719	SNORD15B	ILMN_1713832	SNORD15B_ILMN_1713832	0.4	0.53	0.52	1.21	1.15	-0.31	-0.52	0.385	0.254	0.265	0.00401	0.0075	0.129	0.226
1400056	SNORD30	ILMN_1666599	SNORD30_ILMN_1666599	0.39	0.37	-0.09	1.3	1.57	-0.32	0.39	0.249	0.274	0.781	0.00603	0.00196	0.247	0.376
7550593	SNORA73A	ILMN_3240022	SNORA73A_ILMN_3240022	0.39	0.08	-0.71	0.61	0.46	0.13	0.5	0.105	0.724	0.0131	0.0332	0.12	0.753	0.142
1430037	SNORD17	ILMN_3240781	SNORD17_ILMN_3240781	0.39	-0.28	-0.36	1.79	1.05	-0.3	-0.13	0.625	0.727	0.65	0.018	0.138	0.551	0.876
5490458	SNORD14A	ILMN_1799381	SNORD14A_ILMN_1799381	0.38	0.57	-0.09	-0.21	-0.1	-0.49	0.32	0.369	0.195	0.82	0.612	0.795	0.0851	0.26
4610201	SNORA10	ILMN_2189842	SNORA10_ILMN_2189842	0.38	0.53	0.09	1.27	1.46	-0.29	-0.04	0.244	0.125	0.776	0.00255	0.00317	0.176	0.921
7210538	SNORA43	ILMN_3243908	SNORA43_ILMN_3243908	0.37	0.29	0.09	0.87	1.38	-0.18	-0.08	0.194	0.301	0.73	0.0123	0.00288	0.473	0.816
7560731	SNORA64	ILMN_1709604	SNORA64_ILMN_1709604	0.33	0.48	0.11	1.99	2.42	-0.33	-0.14	0.413	0.239	0.781	0.000222	1.34e-06	0.227	0.72
5890692	SNORD100	ILMN_1673181	SNORD100_ILMN_1673181	0.33	0.34	-0.3	0.15	0.34	-0.44	0.35	0.438	0.419	0.475	0.699	0.371	0.0632	0.426
1090671	SNORA59A	ILMN_3240116	SNORA59A_ILMN_3240116	0.32	0.57	0.06	1.23	0.72	-0.44	0.05	0.403	0.155	0.873	0.000992	0.0254	0.185	0.917
2640092	SNORA16A	ILMN_3246465	SNORA16A_ILMN_3246465	0.32	0.15	-0.36	1.33	1.66	-0.15	0.39	0.393	0.672	0.336	0.000852	0.00115	0.712	0.441
7320278	SNORD12	ILMN_3236049	SNORD12_ILMN_3236049	0.32	0.01	-0.31	1.82	1.96	-0.11	0.41	0.237	0.955	0.246	0.00252	0.00225	0.444	0.473
2450020	SNORD56	ILMN_2209515	SNORD56_ILMN_2209515	0.31	0.49	0.02	1.37	1.73	-0.62	-0.01	0.606	0.419	0.977	0.0234	0.0203	0.127	0.983
1240273	SNORD110	ILMN_3235397	SNORD110_ILMN_3235397	0.31	-0.08	-0.06	2.73	2.78	0.26	0.19	0.065	0.569	0.669	2.08e-05	8.18e-05	0.23	0.659
5260280	SNORA80	ILMN_3238554	SNORA80_ILMN_3238554	0.3	0.2	0.32	4.8	4.97	1.17	-0.28	0.406	0.568	0.381	2.58e-06	4.39e-07	0.0409	0.448
1430427	SNORD16	ILMN_1669210	SNORD16_ILMN_1669210	0.3	-0.96	-1.4	0.99	0.88	-0.28	0.24	0.681	0.222	0.0927	0.00722	0.0602	0.527	0.708
6860451	SNORA13	ILMN_3241985	SNORA13_ILMN_3241985	0.29	-0.06	-0.2	3.56	3.79	0.94	0.46	0.281	0.815	0.446	2.91e-05	2.6e-06	0.0496	0.299
1820400	SNORA52	ILMN_3247679	SNORA52_ILMN_3247679	0.28	0.13	-0.19	-0.25	-0.45	-0.35	0.09	0.484	0.731	0.622	0.09	0.0718	0.26	0.67
6580446	SNORD83A	ILMN_1653927	SNORD83A_ILMN_1653927	0.28	0.11	0.17	1.25	2.2	-0.18	-0.15	0.0358	0.314	0.145	0.000508	1.42e-06	0.461	0.366
3840091	SNORD35A	ILMN_1667609	SNORD35A_ILMN_1667609	0.27	0.37	0.13	1.6	2.26	-0.09	0.09	0.397	0.262	0.674	0.000249	0.00107	0.628	0.76
6420068	SNORD11	ILMN_3237971	SNORD11_ILMN_3237971	0.27	0.19	0.3	0.09	0.4	0.03	-0.32	0.468	0.611	0.42	0.791	0.21	0.764	0.379
6510327	SNORD96A	ILMN_3244640	SNORD96A_ILMN_3244640	0.27	-0.04	-0.82	1.69	1.4	-0.75	0.42	0.569	0.936	0.121	0.000988	0.00145	0.0745	0.437
6590164	SNORA75	ILMN_3240150	SNORA75_ILMN_3240150	0.26	0.2	0.37	0.69	1.43	-0.03	-0.1	0.23	0.331	0.101	0.0646	0.00995	0.922	0.508
650278	SNORA70	ILMN_1730773	SNORA70_ILMN_1730773	0.25	0.22	-0.38	-0.19	-0.39	-0.64	0.08	0.614	0.655	0.446	0.624	0.286	0.0153	0.751
4390044	SNORD74	ILMN_3246754	SNORD74_ILMN_3246754	0.25	0.04	-0.04	5.24	5.45	1.69	0.21	0.178	0.813	0.817	2.64e-06	2.47e-06	0.0254	0.421
5890477	SNORA32	ILMN_2085525	SNORA32_ILMN_2085525	0.24	0.49	0.25	1.45	1.66	0.17	0.11	0.507	0.206	0.493	0.00612	0.000223	0.444	0.622
3450630	SNORD83B	ILMN_3244157	SNORD83B_ILMN_3244157	0.24	0.3	-0.18	2.3	3.03	-0.42	0.17	0.609	0.53	0.702	0.00825	2.54e-05	0.0627	0.647
4560138	SNORA30	ILMN_3238259	SNORA30_ILMN_3238259	0.24	0.02	0.03	3.81	4.11	0.77	0.06	0.186	0.882	0.839	2.92e-05	3.21e-07	0.0468	0.697
6860605	SNORD51	ILMN_3240306	SNORD51_ILMN_3240306	0.24	0	0.06	1.77	2.18	0.17	-0.19	0.509	0.998	0.861	0.000898	0.00189	0.564	0.52
6840504	SNORD113-6	ILMN_3309279	SNORD113-6_ILMN_3309279	0.23	0.13	0.21	0.45	0.02	0.22	0.09	0.226	0.473	0.261	0.208	0.894	0.242	0.577
2680040	SNORA77	ILMN_3243428	SNORA77_ILMN_3243428	0.23	-0.23	-0.47	2.22	2.75	0.09	0.17	0.164	0.155	0.0165	0.00033	0.000283	0.731	0.664
2570609	SNORA26	ILMN_3238613	SNORA26_ILMN_3238613	0.23	-0.59	-0.82	1.01	1.79	0.26	0.25	0.542	0.141	0.0556	0.0492	0.000322	0.456	0.537
1410725	SNORD42B	ILMN_1810762	SNORD42B_ILMN_1810762	0.22	0.41	0.19	0.96	0.85	-0.01	0	0.161	0.0269	0.234	0.00023	0.00257	0.973	0.993
5130348	SNORD69	ILMN_3309694	SNORD69_ILMN_3309694	0.22	0.16	0.32	0.78	1.2	-0.34	-0.4	0.621	0.726	0.476	0.181	0.0518	0.0154	0.385
2190647	SNORD41	ILMN_3245549	SNORD41_ILMN_3245549	0.22	0.01	0.01	0.37	1.13	0.03	0.04	0.0618	0.933	0.921	0.135	0.0211	0.833	0.805
5810343	SNORA14A	ILMN_3241036	SNORA14A_ILMN_3241036	0.22	-0.07	0.3	0.91	1.14	0.42	0.08	0.0796	0.534	0.0249	0.0149	0.0282	0.0509	0.804
2140086	SNORD4B	ILMN_1720794	SNORD4B_ILMN_1720794	0.21	0.38	0.03	0.11	0.14	-0.19	0.27	0.465	0.209	0.919	0.632	0.366	0.367	0.108
1980669	SNORD68	ILMN_2082762	SNORD68_ILMN_2082762	0.21	0.37	0.12	1.3	1.45	-0.55	-0.71	0.741	0.565	0.855	0.0238	9.09e-05	0.0597	0.227
5390767	SNORA2B	ILMN_3249538	SNORA2B_ILMN_3249538	0.21	-0.38	-0.3	5.28	5.28	2.22	0.2	0.602	0.368	0.465	7.76e-07	2.25e-06	0.006	0.493
5690470	SNORD5	ILMN_3237236	SNORD5_ILMN_3237236	0.2	0.18	0.22	0.1	-0.01	-0.11	-0.15	0.133	0.162	0.0979	0.507	0.959	0.408	0.294
6980259	SNORD37	ILMN_3240595	SNORD37_ILMN_3240595	0.2	0.07	0.13	1.08	1.86	0.11	0.07	0.189	0.617	0.362	4.65e-05	0.00034	0.394	0.571
5360341	SNORD38B	ILMN_1741944	SNORD38B_ILMN_1741944	0.2	0.05	0.17	0.6	1.2	0.07	-0.1	0.406	0.84	0.486	0.0168	0.00162	0.699	0.404
6660010	SNORD31	ILMN_2072391	SNORD31_ILMN_2072391	0.2	0.02	-0.33	1.25	1.1	0.05	0.32	0.518	0.942	0.301	0.0302	0.0215	0.764	0.206
7330463	SNORA3	ILMN_3239108	SNORA3_ILMN_3239108	0.2	-0.09	-0.81	1.22	1.52	-0.41	0.37	0.67	0.851	0.12	0.000159	0.000608	0.449	0.561
650209	SNORD1A	ILMN_3244281	SNORD1A_ILMN_3244281	0.19	0.72	0.48	-0.09	0	-0.7	-0.55	0.688	0.155	0.32	0.782	0.996	0.0363	0.0167
4490048	SNORD4A	ILMN_1716441	SNORD4A_ILMN_1716441	0.19	0.53	0.12	0.21	0.06	-0.3	0.27	0.471	0.0785	0.65	0.703	0.832	0.172	0.218
3130204	SNORD114-8	ILMN_3308000	SNORD114-8_ILMN_3308000	0.19	0.24	0.22	0.21	0.06	0.01	0.04	0.116	0.0578	0.0808	0.177	0.581	0.901	0.703
2640019	SNORA65	ILMN_1787326	SNORA65_ILMN_1787326	0.19	-0.03	-0.34	1.66	2.26	0.1	0.17	0.473	0.909	0.209	0.000447	5.3e-05	0.657	0.758
1470343	SNORA70C	ILMN_3245878	SNORA70C_ILMN_3245878	0.18	0.42	0.48	-0.01	0.15	-0.24	-0.35	0.154	0.00836	0.00451	0.965	0.344	0.213	0.122
1190398	SNORD60	ILMN_3238481	SNORD60_ILMN_3238481	0.17	0.41	0.19	0.14	-0.05	-0.02	0.23	0.252	0.0237	0.21	0.348	0.8	0.855	0.287
6400592	SNORD95	ILMN_3243452	SNORD95_ILMN_3243452	0.16	0.2	0.53	2.55	2.71	0.29	-0.19	0.244	0.162	0.00531	1.07e-05	0.000165	0.122	0.206
6590408	SNORD26	ILMN_1691550	SNORD26_ILMN_1691550	0.16	0.16	0.25	0.28	0.07	0.07	0	0.242	0.245	0.0978	0.0413	0.554	0.539	0.992
580373	SNORA36A	ILMN_3241814	SNORA36A_ILMN_3241814	0.16	0.08	0.19	0.25	-0.07	-0.11	-0.16	0.201	0.478	0.133	0.218	0.602	0.516	0.144
3450327	SNORA41	ILMN_3241798	SNORA41_ILMN_3241798	0.16	0	-0.2	1.17	2.22	0.09	0.02	0.633	0.99	0.552	0.0764	0.0113	0.611	0.963
1440072	SNORD65	ILMN_3246353	SNORD65_ILMN_3246353	0.16	-0.11	-0.85	1.45	1.75	0.04	0.55	0.653	0.766	0.0491	0.00329	0.00036	0.901	0.119
3370537	SNORA38	ILMN_3244597	SNORA38_ILMN_3244597	0.16	-0.13	-0.06	0.67	1.73	0.12	0.08	0.347	0.455	0.727	0.145	0.003	0.408	0.585
7650079	SNORA71B	ILMN_3243667	SNORA71B_ILMN_3243667	0.15	0.17	0.21	1.55	2.37	0.08	-0.21	0.273	0.22	0.152	0.000104	8.8e-07	0.503	0.233
4760121	SNORD103A	ILMN_3234751	SNORD103A_ILMN_3234751	0.15	0.14	0.17	0.51	0.25	0.03	-0.01	0.344	0.391	0.294	0.00527	0.17	0.815	0.955
2320543	SNORA15	ILMN_3241884	SNORA15_ILMN_3241884	0.15	0.1	-0.19	1.16	1.97	0.26	0.49	0.508	0.662	0.414	0.00486	0.00312	0.408	0.336
5340170	SNORD21	ILMN_1774973	SNORD21_ILMN_1774973	0.15	-0.09	-0.35	3.3	3.48	0.51	0.06	0.712	0.831	0.402	6.93e-05	1.68e-06	0.299	0.914
3870156	SNORD91A	ILMN_3241369	SNORD91A_ILMN_3241369	0.14	0.17	0.1	0.7	1.24	0.02	0.07	0.529	0.461	0.638	0.0343	0.0419	0.937	0.698
1010669	SNORD113-5	ILMN_3308183	SNORD113-5_ILMN_3308183	0.14	0.08	0.04	0.22	-0.03	-0.05	0.12	0.269	0.496	0.756	0.0968	0.863	0.678	0.432
1510021	SNORD9	ILMN_3244449	SNORD9_ILMN_3244449	0.14	0.05	0.09	0.33	-0.2	0.23	-0.14	0.377	0.743	0.543	0.177	0.141	0.104	0.312
4210044	SNORD46	ILMN_1682402	SNORD46_ILMN_1682402	0.14	0.02	-0.01	5.28	5.89	1.86	0.05	0.704	0.958	0.988	4.4e-06	7.12e-07	0.0161	0.888
360072	SNORD116-13	ILMN_3308515	SNORD116-13_ILMN_3308515	0.14	-0.1	0.16	0.05	-0.09	0.2	-0.07	0.443	0.569	0.372	0.722	0.559	0.113	0.534
7000097	SNORA2A	ILMN_3248232	SNORA2A_ILMN_3248232	0.14	-0.14	0.09	2.3	2.54	0.32	-0.1	0.203	0.21	0.386	0.000637	0.00201	0.0359	0.466
4610458	SNORD116-4	ILMN_2067520	SNORD116-4_ILMN_2067520	0.13	0.18	0.25	0.03	0.02	-0.01	-0.1	0.257	0.136	0.0548	0.766	0.843	0.959	0.399
4540092	SNORA71C	ILMN_3240216	SNORA71C_ILMN_3240216	0.13	0.08	0.16	0.12	0.06	0.08	0.01	0.312	0.508	0.224	0.325	0.709	0.69	0.958
1340497	SNORD18A	ILMN_3237050	SNORD18A_ILMN_3237050	0.13	-0.02	-0.38	-0.01	0.77	0.27	0.15	0.3	0.869	0.0178	0.976	0.000787	0.135	0.352
830349	SNORD33	ILMN_1682354	SNORD33_ILMN_1682354	0.12	0.22	-0.02	0.82	0.85	-0.21	-0.12	0.597	0.349	0.918	0.0441	0.0026	0.202	0.781
5080095	SNORD105	ILMN_3234984	SNORD105_ILMN_3234984	0.12	-0.07	-0.06	-0.13	-0.04	0	0	0.358	0.583	0.64	0.25	0.806	0.981	0.971
3190382	SNORD48	ILMN_2157020	SNORD48_ILMN_2157020	0.11	0.85	0.52	1.02	0.52	-0.75	-0.07	0.759	0.0542	0.19	0.0153	0.108	0.15	0.657
2810402	SNORA54	ILMN_3237035	SNORA54_ILMN_3237035	0.11	0.07	0.03	0.59	1.74	0	0.14	0.374	0.563	0.824	0.00454	0.00741	0.999	0.317
3990288	SNORD113-2	ILMN_3310905	SNORD113-2_ILMN_3310905	0.11	0.02	0.12	0.06	0.03	-0.03	-0.01	0.375	0.888	0.347	0.591	0.77	0.799	0.953
3360176	SNORD90	ILMN_3240108	SNORD90_ILMN_3240108	0.11	0.01	-0.01	0.05	0.14	0.16	-0.04	0.395	0.915	0.947	0.739	0.472	0.316	0.713
2750446	SNORD36A	ILMN_2135175	SNORD36A_ILMN_2135175	0.11	-0.3	-0.67	0.95	0.61	-0.13	0.37	0.678	0.266	0.0335	0.00367	0.064	0.194	0.353
6290091	SNORD104	ILMN_3248218	SNORD104_ILMN_3248218	0.1	0.49	0.05	0.67	0.25	-0.85	-0.07	0.89	0.516	0.943	0.177	0.579	0.0352	0.804
2640754	SNORD72	ILMN_3243450	SNORD72_ILMN_3243450	0.1	0.19	0.11	0.26	0.03	-0.01	-0.07	0.478	0.202	0.412	0.0676	0.821	0.96	0.632
3170753	SNORD24	ILMN_3237251	SNORD24_ILMN_3237251	0.1	0.12	-0.04	0.36	0.23	0.06	0.02	0.521	0.458	0.804	0.0464	0.21	0.783	0.857
1780035	SNORD19	ILMN_3243049	SNORD19_ILMN_3243049	0.1	0.02	0.08	0.18	-0.12	0.16	-0.03	0.444	0.892	0.572	0.149	0.368	0.228	0.786
3360703	SNORA48	ILMN_3235264	SNORA48_ILMN_3235264	0.1	-0.05	0.08	4.17	4.64	0.75	0.07	0.372	0.621	0.483	3.97e-05	3.16e-06	0.0578	0.505
6380491	SNORD96B	ILMN_3247008	SNORD96B_ILMN_3247008	0.1	-0.1	-0.29	1.65	1.3	0.07	0.16	0.708	0.713	0.288	0.000499	0.00315	0.781	0.528
4220356	SNORD1C	ILMN_3246944	SNORD1C_ILMN_3246944	0.09	0.54	0.48	0.07	0.32	-0.08	-0.06	0.663	0.0334	0.0479	0.655	0.182	0.819	0.756
5700634	SNORD12B	ILMN_3240002	SNORD12B_ILMN_3240002	0.09	0.15	0.18	1.23	1.36	0.42	0.14	0.569	0.367	0.271	0.0162	0.0677	0.0821	0.238
3400139	SNORD101	ILMN_1697989	SNORD101_ILMN_1697989	0.09	0.14	0.1	1.2	1.48	-0.32	-0.25	0.443	0.247	0.421	0.00741	0.0372	0.118	0.0664
380324	SNORA35	ILMN_3249351	SNORA35_ILMN_3249351	0.09	0.14	0.03	0.05	-0.01	-0.14	-0.1	0.435	0.268	0.814	0.744	0.957	0.277	0.373
450682	SNORA49	ILMN_3235231	SNORA49_ILMN_3235231	0.09	0.12	-0.02	1.27	1.79	0.07	0.04	0.684	0.595	0.925	0.0488	0.00606	0.686	0.809
1470722	SNORA36C	ILMN_3235334	SNORA36C_ILMN_3235334	0.09	0.11	0.02	0.29	0.39	0.2	0.05	0.446	0.368	0.835	0.171	0.28	0.188	0.645
2360041	SNORD98	ILMN_3247625	SNORD98_ILMN_3247625	0.09	0.1	0	0.08	0.01	0.06	0.06	0.494	0.445	0.984	0.546	0.94	0.571	0.509
3190561	SNORD35B	ILMN_1694367	SNORD35B_ILMN_1694367	0.09	0.06	0.07	1.36	1.44	-0.52	-0.45	0.896	0.927	0.92	0.00664	0.0323	0.102	0.374
6060647	SNORD113-1	ILMN_3309874	SNORD113-1_ILMN_3309874	0.09	-0.06	0.07	-0.09	0.1	0.21	-0.07	0.633	0.771	0.705	0.729	0.713	0.0892	0.675
3460722	SNORD116-29	ILMN_3310593	SNORD116-29_ILMN_3310593	0.08	0.09	0.1	0.16	-0.05	0.05	0.01	0.495	0.458	0.422	0.283	0.668	0.642	0.957
2120369	SNORD107	ILMN_1750402	SNORD107_ILMN_1750402	0.08	0.04	0.08	-0.02	-0.22	-0.14	0.01	0.549	0.765	0.541	0.899	0.0723	0.294	0.946
6270731	SNORD117	ILMN_3242908	SNORD117_ILMN_3242908	0.08	-0.03	0.1	0.42	1.26	0	0.02	0.643	0.863	0.587	0.115	0.0013	0.981	0.896
1440730	SNORA29	ILMN_3236594	SNORA29_ILMN_3236594	0.08	-0.08	0.34	-0.1	-0.03	0.21	-0.3	0.795	0.783	0.285	0.863	0.885	0.233	0.346
4230477	SNORA76	ILMN_3237562	SNORA76_ILMN_3237562	0.08	-0.11	-0.48	0.92	1.64	-0.31	0.2	0.86	0.817	0.323	0.0234	0.00117	0.546	0.727
5260463	SNORD114-31	ILMN_3310451	SNORD114-31_ILMN_3310451	0.08	-0.14	0	-0.03	-0.11	0.09	0.04	0.398	0.177	0.961	0.874	0.334	0.462	0.731
730309	SNORD114-17	ILMN_3309428	SNORD114-17_ILMN_3309428	0.08	-0.15	0.05	0.01	-0.19	0.11	-0.05	0.565	0.286	0.697	0.931	0.22	0.435	0.667
2260437	SNORA68	ILMN_3244592	SNORA68_ILMN_3244592	0.07	0.47	0.47	0.55	0.81	-0.38	-0.42	0.852	0.218	0.215	0.156	0.00267	0.191	0.0263
1820678	SNORD45C	ILMN_3236110	SNORD45C_ILMN_3236110	0.07	0.25	0.15	0.03	-0.08	-0.14	-0.11	0.579	0.0801	0.237	0.877	0.483	0.215	0.352
6040121	SNORA81	ILMN_3248440	SNORA81_ILMN_3248440	0.07	0.11	0	0.15	0.07	-0.09	0.12	0.613	0.433	1	0.299	0.69	0.615	0.578
2490523	SNORD78	ILMN_3249211	SNORD78_ILMN_3249211	0.06	0.11	0.06	-0.02	-0.2	0.01	0	0.716	0.491	0.696	0.894	0.126	0.921	0.986
3830196	SNORD28	ILMN_1656303	SNORD28_ILMN_1656303	0.06	0.09	-0.06	0.03	0.12	-0.02	0.19	0.634	0.505	0.644	0.802	0.351	0.884	0.0861
1240202	SNORD18C	ILMN_1721749	SNORD18C_ILMN_1721749	0.06	0.02	-0.11	0.38	0.11	-0.01	0.12	0.535	0.859	0.313	0.0327	0.431	0.963	0.292
5550189	SNORD44	ILMN_3240848	SNORD44_ILMN_3240848	0.06	0.01	0.07	0.08	0.14	0.11	-0.11	0.595	0.954	0.546	0.543	0.274	0.442	0.333
3130685	SNORD113-3	ILMN_3310321	SNORD113-3_ILMN_3310321	0.06	-0.01	0.02	0.05	-0.08	-0.02	0.06	0.657	0.929	0.867	0.822	0.706	0.904	0.642
1340373	SNORD119	ILMN_3245376	SNORD119_ILMN_3245376	0.06	-0.05	0.18	0.08	-0.1	0.06	-0.29	0.728	0.784	0.314	0.524	0.555	0.585	0.0491
4260431	SNORD22	ILMN_1724884	SNORD22_ILMN_1724884	0.05	0.34	0	2.1	1.59	-0.28	0.39	0.838	0.177	0.986	0.000174	4.19e-05	0.125	0.181
5910053	SNORD53	ILMN_3245541	SNORD53_ILMN_3245541	0.05	0.28	0.74	0.81	1.12	-0.37	-0.92	0.922	0.599	0.192	0.0821	0.047	0.091	0.0812
4480563	SNORD125	ILMN_3249543	SNORD125_ILMN_3249543	0.05	0.28	0	0.83	0.59	-0.05	0.13	0.797	0.186	0.998	0.0221	0.00553	0.796	0.503
3390360	SNORA55	ILMN_3238745	SNORA55_ILMN_3238745	0.05	0.21	-0.03	0.97	1.56	-0.08	0.17	0.711	0.151	0.836	0.00689	3.95e-05	0.646	0.255
2320523	SNORA5C	ILMN_3246708	SNORA5C_ILMN_3246708	0.05	0.14	0.19	0.46	1.45	0.19	-0.21	0.814	0.55	0.408	0.0867	2.28e-05	0.162	0.388
5490465	SNORA4	ILMN_3238672	SNORA4_ILMN_3238672	0.05	0.13	-0.22	3.76	4.43	0.4	-0.09	0.835	0.581	0.365	0.00011	2.77e-06	0.153	0.807
4560370	SNORA11C	ILMN_3240883	SNORA11C_ILMN_3240883	0.05	-0.07	0.02	0.47	0.54	0.1	-0.1	0.754	0.687	0.923	0.366	0.0524	0.653	0.472
5960184	SNORD116-2	ILMN_2107655	SNORD116-2_ILMN_2107655	0.05	-0.12	-0.09	-0.04	-0.22	0.04	-0.13	0.739	0.423	0.529	0.837	0.0851	0.723	0.26
1940598	SNORD14B	ILMN_1707598	SNORD14B_ILMN_1707598	0.05	-0.15	-0.31	0.54	1.05	-0.14	0.16	0.816	0.483	0.166	0.0764	0.00827	0.532	0.413
4850278	SNORA25	ILMN_1682038	SNORA25_ILMN_1682038	0.04	0.46	0.2	1.04	1.85	0.21	0.46	0.911	0.238	0.586	0.0327	0.000369	0.414	0.321
4890546	SNORA71A	ILMN_3245605	SNORA71A_ILMN_3245605	0.04	0.39	0.17	0.79	0.53	-0.37	-0.29	0.867	0.173	0.53	0.0648	0.0983	0.145	0.423
1500598	SNORD88B	ILMN_3236097	SNORD88B_ILMN_3236097	0.04	0.17	0.05	0.49	0.5	-0.16	0	0.797	0.313	0.773	0.136	0.0427	0.418	0.997
5810056	SNORD32B	ILMN_3247170	SNORD32B_ILMN_3247170	0.04	0.1	0.01	0.51	0.71	0	0.11	0.817	0.522	0.97	0.005	0.00267	0.987	0.486
5870753	HBII-52-45	ILMN_3310085	HBII-52-45_ILMN_3310085	0.04	0.06	0.07	0	0.01	-0.03	-0.15	0.741	0.646	0.579	0.987	0.929	0.859	0.145
3460202	SNORD66	ILMN_3247671	SNORD66_ILMN_3247671	0.04	0.06	-0.01	0.36	1.12	-0.08	0.11	0.751	0.602	0.9	0.0262	0.000195	0.483	0.4
7400332	SNORD111	ILMN_3237039	SNORD111_ILMN_3237039	0.04	0.06	-0.12	0.31	0.66	-0.17	0.1	0.81	0.747	0.513	0.0448	0.00144	0.329	0.418
3060468	SNORD114-29	ILMN_3308375	SNORD114-29_ILMN_3308375	0.04	0.06	-0.12	0.03	-0.01	0.22	0.28	0.683	0.589	0.248	0.854	0.963	0.0785	0.0707
1110086	SNORA46	ILMN_3239276	SNORA46_ILMN_3239276	0.04	-0.03	-0.07	3.06	3.82	0.32	0.12	0.781	0.871	0.666	0.000134	5.28e-06	0.193	0.523
2230066	SNORD108	ILMN_1780508	SNORD108_ILMN_1780508	0.04	-0.19	-0.06	0.05	-0.17	0.2	0.01	0.731	0.125	0.581	0.672	0.227	0.23	0.958
7570110	SNORA7B	ILMN_1660900	SNORA7B_ILMN_1660900	0.03	0.21	0.25	2.63	3.18	0.37	-0.36	0.928	0.564	0.498	0.00187	1.78e-06	0.356	0.155
3180608	SNORA66	ILMN_1689616	SNORA66_ILMN_1689616	0.03	0.1	0.04	-0.09	0.74	-0.33	-0.11	0.914	0.752	0.895	0.626	0.0734	0.14	0.702
830575	SNORD38A	ILMN_1684278	SNORD38A_ILMN_1684278	0.03	0.08	-0.19	-0.53	0.37	-0.12	-0.03	0.95	0.873	0.696	0.0403	0.179	0.322	0.961
3120020	SNORA37	ILMN_3243135	SNORA37_ILMN_3243135	0.03	0	0.03	0.07	0.08	-0.09	-0.02	0.799	0.991	0.781	0.82	0.445	0.587	0.872
1780711	SNORD19B	ILMN_3236052	SNORD19B_ILMN_3236052	0.03	-0.02	0.07	0.03	-0.03	0.05	0.03	0.787	0.849	0.567	0.863	0.83	0.678	0.85
540520	SNORD8	ILMN_3248874	SNORD8_ILMN_3248874	0.03	-0.06	0	0.13	-0.04	0.32	0.05	0.852	0.721	0.978	0.439	0.814	0.0221	0.788
4010193	SNORA7A	ILMN_3241993	SNORA7A_ILMN_3241993	0.03	-0.08	0.06	2.52	3.26	0.41	0.08	0.85	0.683	0.739	0.000463	4.79e-07	0.0377	0.759
2940204	SNORA17	ILMN_3243129	SNORA17_ILMN_3243129	0.03	-0.1	-0.41	0.82	1.1	-0.06	0.04	0.912	0.674	0.107	0.0014	0.00658	0.729	0.906
1050575	SNORA20	ILMN_3245228	SNORA20_ILMN_3245228	0.03	-0.2	-0.09	2.96	3.52	0.59	0.06	0.804	0.168	0.523	0.000678	1.69e-06	0.0778	0.606
4070703	SNORD92	ILMN_3245759	SNORD92_ILMN_3245759	0.02	0.19	0.29	0.42	0.65	-0.25	-0.2	0.893	0.237	0.0932	0.0847	0.101	0.207	0.0669
20349	SNORA5B	ILMN_3244678	SNORA5B_ILMN_3244678	0.02	0.19	0.12	0.13	0.06	-0.13	0.22	0.902	0.22	0.441	0.524	0.79	0.538	0.163
2320142	SNORD114-27	ILMN_3309334	SNORD114-27_ILMN_3309334	0.02	0.1	-0.09	0.06	0.01	0.01	0.11	0.88	0.438	0.487	0.648	0.951	0.926	0.357
460246	SNORD50B	ILMN_3247444	SNORD50B_ILMN_3247444	0.02	0.01	0.04	0.27	0.15	0.07	0.07	0.903	0.951	0.806	0.342	0.374	0.76	0.595
3990446	SNORD114-13	ILMN_3311105	SNORD114-13_ILMN_3311105	0.02	0.01	-0.07	0.15	0.03	0.02	0.19	0.866	0.911	0.561	0.264	0.807	0.849	0.0986
5890551	SNORD59A	ILMN_3239851	SNORD59A_ILMN_3239851	0.02	-0.05	0.05	0.07	0.33	-0.04	-0.08	0.855	0.676	0.689	0.589	0.0416	0.743	0.607
4070687	SNORD126	ILMN_3236804	SNORD126_ILMN_3236804	0.01	0.12	-0.15	0.34	0.39	-0.12	0.3	0.912	0.404	0.306	0.049	0.0349	0.395	0.162
5810520	SNORD94	ILMN_3245274	SNORD94_ILMN_3245274	0.01	0.09	-0.04	1.12	1.01	-0.04	0.11	0.943	0.534	0.754	0.00525	0.0376	0.75	0.415
5900551	SNORD115-48	ILMN_3308113	SNORD115-48_ILMN_3308113	0.01	0.06	0.17	0.05	-0.11	0.03	-0.18	0.949	0.694	0.285	0.853	0.381	0.774	0.263
6590630	SNORD85	ILMN_3247303	SNORD85_ILMN_3247303	0.01	0	-0.04	0.13	-0.13	0.06	0.12	0.937	0.98	0.786	0.42	0.351	0.663	0.419
1230491	SNORD107	ILMN_2132082	SNORD107_ILMN_2132082	0.01	-0.03	-0.14	0.14	0.03	0.13	0.11	0.925	0.83	0.403	0.409	0.834	0.311	0.405
4390482	SNORD2	ILMN_3237309	SNORD2_ILMN_3237309	0.01	-0.04	-0.15	0.41	1.67	-0.03	0.21	0.933	0.784	0.303	0.0177	8.37e-06	0.834	0.0482
5420040	SNORD111B	ILMN_3241848	SNORD111B_ILMN_3241848	0.01	-0.06	-0.04	-0.06	0.1	0.13	-0.03	0.924	0.684	0.774	0.81	0.586	0.295	0.804
630187	SNORD80	ILMN_3243244	SNORD80_ILMN_3243244	0.01	-0.21	-0.87	1.15	1.06	0.11	0.73	0.974	0.391	0.00843	3.53e-05	0.00925	0.545	0.0432
870053	SNORA84	ILMN_3244154	SNORA84_ILMN_3244154	0.01	-0.29	0.16	1.72	2.31	0.51	-0.84	0.993	0.704	0.836	0.00142	0.000177	0.32	0.162
6620047	SNORD88C	ILMN_3237615	SNORD88C_ILMN_3237615	0.01	-0.34	0.16	0.62	1.07	0.25	-0.15	0.934	0.0832	0.369	0.0122	0.00241	0.138	0.551
870504	SNORD91B	ILMN_3242443	SNORD91B_ILMN_3242443	0	0.17	0.17	0.29	0.65	0.05	-0.16	0.986	0.135	0.138	0.116	0.059	0.612	0.368
240692	SNORD20	ILMN_3241738	SNORD20_ILMN_3241738	0	0.01	0.08	0.14	0.02	0.03	0.01	0.99	0.945	0.566	0.213	0.862	0.817	0.912
4640279	SNORD62B	ILMN_3248270	SNORD62B_ILMN_3248270	0	-0.11	0.35	1.57	1.75	0.03	-0.44	1	0.665	0.187	7.93e-06	1.51e-05	0.768	0.131
380017	SNORA38B	ILMN_3235270	SNORA38B_ILMN_3235270	0	-0.14	0	4.09	4.7	1	0.08	0.999	0.56	0.996	0.000506	3.82e-07	0.0153	0.794
3990497	SNORA61	ILMN_3245458	SNORA61_ILMN_3245458	-0.01	0.26	-0.62	0.55	1.26	-0.53	0.68	0.99	0.689	0.355	0.225	0.0325	0.198	0.385
3830343	SNORA39	ILMN_3245764	SNORA39_ILMN_3245764	-0.01	0.14	0.01	-0.1	0.12	-0.19	0.15	0.976	0.522	0.968	0.472	0.291	0.172	0.427
6840326	SNORD52	ILMN_3246391	SNORD52_ILMN_3246391	-0.01	0.1	-0.04	1.31	1.31	-0.06	0.08	0.977	0.625	0.834	0.000478	0.00504	0.754	0.815
290220	SNORD6	ILMN_3234756	SNORD6_ILMN_3234756	-0.01	0.08	-0.06	0.31	0.66	-0.11	-0.01	0.966	0.641	0.731	0.0786	0.0238	0.542	0.926
10356	SNORD36C	ILMN_2160160	SNORD36C_ILMN_2160160	-0.01	0.03	-0.72	-1.09	-0.72	-0.17	0.18	0.981	0.902	0.0335	0.00745	0.00215	0.247	0.407
2510274	SNORD58A	ILMN_3236149	SNORD58A_ILMN_3236149	-0.01	0.01	-0.02	0.03	-0.01	0.09	0.13	0.955	0.931	0.854	0.844	0.911	0.558	0.274
5860632	SNORD114-30	ILMN_3310050	SNORD114-30_ILMN_3310050	-0.01	0	-0.04	-0.05	0.15	-0.01	0.05	0.932	0.993	0.724	0.702	0.402	0.945	0.581
5290543	SNORD15A	ILMN_1767869	SNORD15A_ILMN_1767869	-0.01	-0.02	0.21	-0.23	0.04	0.28	0.04	0.941	0.93	0.33	0.152	0.867	0.231	0.895
2360204	SNORD127	ILMN_3242633	SNORD127_ILMN_3242633	-0.01	-0.08	-0.04	0.04	-0.01	0.09	0.08	0.966	0.606	0.809	0.74	0.906	0.486	0.534
4290373	SNORD18B	ILMN_1680179	SNORD18B_ILMN_1680179	-0.01	-0.13	-0.09	0.16	0.53	-0.05	0.11	0.904	0.293	0.447	0.357	0.0478	0.728	0.486
1340164	SNORD67	ILMN_3248712	SNORD67_ILMN_3248712	-0.02	0.13	0	1.13	1.11	-0.17	-0.11	0.901	0.488	0.981	0.000386	0.00463	0.432	0.54
6250161	SNORD113-9	ILMN_3309854	SNORD113-9_ILMN_3309854	-0.02	0.02	-0.13	-0.06	-0.06	-0.09	-0.14	0.834	0.884	0.282	0.769	0.63	0.734	0.287
1090386	SNORD36B	ILMN_3237044	SNORD36B_ILMN_3237044	-0.02	-0.03	-0.09	0.02	-0.02	0.1	0.05	0.876	0.787	0.486	0.881	0.856	0.523	0.586
7100474	SNORD109A	ILMN_3245599	SNORD109A_ILMN_3245599	-0.02	-0.08	0.02	-0.1	0.16	-0.01	-0.09	0.863	0.56	0.873	0.449	0.177	0.958	0.427
4730102	SNORD47	ILMN_3236650	SNORD47_ILMN_3236650	-0.02	-0.08	0.01	-0.03	0.2	-0.03	-0.06	0.824	0.437	0.941	0.818	0.123	0.823	0.673
460414	SNORA16B	ILMN_3248658	SNORA16B_ILMN_3248658	-0.02	-0.1	-0.03	-0.19	0	0.12	0.01	0.861	0.3	0.781	0.0733	0.965	0.262	0.959
4260056	SNORD114-11	ILMN_3309036	SNORD114-11_ILMN_3309036	-0.03	0.16	0.08	0.2	0.23	-0.13	0.04	0.832	0.274	0.547	0.142	0.0729	0.334	0.621
830471	SNORD58C	ILMN_3239634	SNORD58C_ILMN_3239634	-0.03	0.12	0.12	0.13	0.22	0	-0.05	0.829	0.448	0.423	0.292	0.139	0.977	0.688
2750136	SNORD50A	ILMN_3308788	SNORD50A_ILMN_3308788	-0.03	0.1	0.03	-0.02	0	-0.09	0.15	0.825	0.434	0.808	0.919	0.969	0.48	0.278
1450497	SNORD113-8	ILMN_3308275	SNORD113-8_ILMN_3308275	-0.03	0.09	-0.02	-0.01	0.17	-0.15	0.02	0.835	0.539	0.859	0.957	0.166	0.288	0.891
1510475	SNORA50	ILMN_3242825	SNORA50_ILMN_3242825	-0.03	0.08	0.04	0.1	0.23	0.01	-0.05	0.762	0.496	0.725	0.341	0.065	0.918	0.687
4210259	SNORA19	ILMN_3242748	SNORA19_ILMN_3242748	-0.03	0.04	0.08	0.04	0.46	0.02	-0.04	0.799	0.696	0.469	0.776	0.0106	0.877	0.775
770452	SNORD102	ILMN_3243909	SNORD102_ILMN_3243909	-0.03	-0.01	-0.02	0.1	0.22	0.13	-0.05	0.844	0.947	0.888	0.436	0.145	0.283	0.706
3780050	SNORD34	ILMN_2165762	SNORD34_ILMN_2165762	-0.03	-0.16	-0.14	0.41	0.73	0.09	0.21	0.906	0.539	0.589	0.221	0.0271	0.707	0.404
1240246	SNORD27	ILMN_1755004	SNORD27_ILMN_1755004	-0.03	-0.17	-0.26	0.17	0.1	0.18	0.19	0.851	0.352	0.166	0.355	0.516	0.349	0.225
5870475	SNORA62	ILMN_1700074	SNORA62_ILMN_1700074	-0.03	-0.23	-0.9	1.84	2.58	-0.06	0.32	0.941	0.599	0.069	0.00077	0.000143	0.884	0.586
150326	SNORD58B	ILMN_3238028	SNORD58B_ILMN_3238028	-0.04	0.1	-0.08	0.02	0.14	0.08	0.12	0.711	0.43	0.507	0.866	0.523	0.628	0.41
1400767	SNORD56B	ILMN_1715396	SNORD56B_ILMN_1715396	-0.04	0.07	0.04	-0.02	0.17	-0.02	0.12	0.774	0.607	0.793	0.902	0.284	0.881	0.542
4920296	SNORA60	ILMN_3243894	SNORA60_ILMN_3243894	-0.04	-0.2	0.05	0.69	0.7	0.22	-0.14	0.813	0.268	0.754	0.0227	0.082	0.0595	0.428
3170598	SNORA74B	ILMN_3246935	SNORA74B_ILMN_3246935	-0.04	-0.54	-0.35	1.33	2.12	0.68	0.33	0.929	0.285	0.475	0.0496	0.00113	0.184	0.513
4280369	SNORA69	ILMN_3244883	SNORA69_ILMN_3244883	-0.05	0.07	-0.03	0.12	0.12	-0.07	0.05	0.618	0.51	0.762	0.375	0.321	0.559	0.604
4560228	SNORA1	ILMN_3245893	SNORA1_ILMN_3245893	-0.05	0.05	-0.39	1.49	2.54	0.25	0.14	0.822	0.826	0.0971	0.0124	5.05e-05	0.264	0.289
5910050	SNORA71D	ILMN_3241937	SNORA71D_ILMN_3241937	-0.05	-0.04	-0.02	0.01	0.18	-0.01	-0.01	0.633	0.734	0.863	0.952	0.217	0.929	0.907
3140598	SNORD114-3	ILMN_3310416	SNORD114-3_ILMN_3310416	-0.05	-0.11	-0.12	-0.08	-0.02	-0.06	0	0.676	0.317	0.299	0.839	0.874	0.568	0.997
6270097	SNORD114-24	ILMN_3308030	SNORD114-24_ILMN_3308030	-0.05	-0.14	-0.14	-0.19	-0.13	0.04	0.05	0.736	0.327	0.33	0.174	0.346	0.78	0.757
5910577	SNORA21	ILMN_3244343	SNORA21_ILMN_3244343	-0.05	-0.18	-0.28	3.75	4.44	0.6	-0.13	0.824	0.446	0.254	0.00027	3.52e-07	0.0574	0.664
3990451	SNORD93	ILMN_3246529	SNORD93_ILMN_3246529	-0.05	-0.23	-0.04	0.51	0.6	0.18	-0.12	0.65	0.0812	0.707	0.0253	0.0333	0.156	0.222
6760132	SNORA51	ILMN_3235316	SNORA51_ILMN_3235316	-0.06	0.24	-0.13	3.71	4.48	0.62	0.03	0.766	0.274	0.542	0.000302	4.23e-06	0.195	0.841
1850551	SNORD10	ILMN_3238955	SNORD10_ILMN_3238955	-0.06	0.17	-0.06	-0.09	0.06	-0.36	-0.13	0.689	0.257	0.664	0.738	0.746	0.109	0.389
5910687	SNORD59B	ILMN_3242164	SNORD59B_ILMN_3242164	-0.06	0.06	-0.13	-0.19	0.74	-0.3	0.08	0.753	0.749	0.479	0.342	0.0273	0.146	0.656
610328	SNORD113-7	ILMN_3308555	SNORD113-7_ILMN_3308555	-0.06	-0.06	0.03	0.17	0.33	0.04	-0.02	0.705	0.679	0.825	0.296	0.123	0.817	0.895
2140484	SNORD109B	ILMN_1787980	SNORD109B_ILMN_1787980	-0.06	-0.13	-0.15	0.05	0.15	0.09	0	0.559	0.199	0.167	0.858	0.325	0.501	0.966
6520164	SNORA40	ILMN_3247222	SNORA40_ILMN_3247222	-0.06	-0.17	-0.15	0.2	0.3	0.47	0.13	0.76	0.388	0.435	0.21	0.108	0.0406	0.492
2750474	SNORD76	ILMN_3247148	SNORD76_ILMN_3247148	-0.07	0.19	-0.23	-0.02	0.33	-0.16	-0.02	0.767	0.415	0.33	0.919	0.476	0.59	0.922
5810411	SNORD89	ILMN_3238662	SNORD89_ILMN_3238662	-0.07	-0.02	0.16	-0.39	-0.2	0.18	-0.08	0.824	0.961	0.627	0.293	0.565	0.714	0.688
6330273	SNORD45B	ILMN_3240576	SNORD45B_ILMN_3240576	-0.07	-0.04	-0.04	0.06	0	0.09	0.15	0.601	0.791	0.74	0.626	0.977	0.345	0.307
6960110	SNORD54	ILMN_1663681	SNORD54_ILMN_1663681	-0.07	-0.17	-0.28	-0.3	-0.2	0.03	0.4	0.662	0.274	0.0943	0.109	0.313	0.854	0.0703
1940767	SNORD121A	ILMN_3246715	SNORD121A_ILMN_3246715	-0.08	0.08	-0.09	0.09	0.01	-0.16	0.02	0.51	0.522	0.474	0.554	0.942	0.307	0.823
5080189	SNORD114-19	ILMN_3309654	SNORD114-19_ILMN_3309654	-0.08	-0.08	-0.04	0.1	0.09	0.14	-0.04	0.523	0.5	0.737	0.385	0.478	0.297	0.695
3850646	SNORA58	ILMN_3242067	SNORA58_ILMN_3242067	-0.09	0.07	0.03	0.09	0.26	-0.3	0.13	0.725	0.771	0.899	0.866	0.249	0.279	0.615
3180647	SNORA72	ILMN_3240418	SNORA72_ILMN_3240418	-0.09	-0.01	-0.35	-0.49	-0.12	0.01	0.33	0.693	0.951	0.141	0.0231	0.574	0.937	0.143
4220072	SNORA47	ILMN_3238670	SNORA47_ILMN_3238670	-0.09	-0.04	-0.08	1.08	1.57	-0.02	0.01	0.572	0.808	0.599	0.0144	0.000196	0.86	0.956
3460450	SNORA78	ILMN_3244940	SNORA78_ILMN_3244940	-0.09	-0.05	0.31	0.45	1.38	0.05	-0.21	0.553	0.736	0.0685	0.00863	0.000927	0.719	0.159
6590202	SNORD70	ILMN_3237685	SNORD70_ILMN_3237685	-0.09	-0.06	0.01	0.12	0.02	-0.08	0.07	0.474	0.613	0.904	0.408	0.858	0.572	0.474
3520170	SNORD87	ILMN_3243248	SNORD87_ILMN_3243248	-0.1	0.21	-0.44	3.57	3.61	0.58	0.59	0.748	0.502	0.194	8.02e-06	1.15e-06	0.258	0.0331
1510328	SNORD63	ILMN_3248394	SNORD63_ILMN_3248394	-0.1	-0.03	0	-0.01	0.12	-0.12	-0.15	0.34	0.769	0.962	0.97	0.535	0.347	0.288
4490102	SNORA36B	ILMN_3247494	SNORA36B_ILMN_3247494	-0.1	-0.12	-0.04	0.03	0.5	0.1	0.08	0.367	0.276	0.73	0.842	0.00236	0.369	0.547
1110725	SNORD121B	ILMN_3240682	SNORD121B_ILMN_3240682	-0.1	-0.13	-0.27	0.05	0.11	-0.03	0.07	0.477	0.361	0.0884	0.634	0.455	0.828	0.605
4060025	SNORA56	ILMN_3240280	SNORA56_ILMN_3240280	-0.11	0.26	0.11	-0.75	-0.14	-0.68	-0.4	0.786	0.504	0.783	0.0172	0.572	0.108	0.255
20543	SNORD71	ILMN_3239272	SNORD71_ILMN_3239272	-0.11	0.05	0.11	2.93	3.4	0.41	-0.04	0.554	0.767	0.548	9.42e-08	8.78e-08	0.00593	0.818
510040	SNORD97	ILMN_3242144	SNORD97_ILMN_3242144	-0.11	-0.03	-0.23	-0.07	-0.03	-0.25	0.02	0.431	0.841	0.142	0.534	0.834	0.13	0.879
4070731	SNORD64	ILMN_1735689	SNORD64_ILMN_1735689	-0.11	-0.07	0.05	0.14	0.09	0.08	-0.12	0.365	0.577	0.658	0.312	0.438	0.537	0.372
6270414	SNORA34	ILMN_3240231	SNORA34_ILMN_3240231	-0.12	-0.07	-0.37	-0.2	0.24	-0.18	0.11	0.544	0.73	0.0969	0.255	0.384	0.129	0.594
5260528	SNORD112	ILMN_3238950	SNORD112_ILMN_3238950	-0.12	-0.09	0.04	-0.03	0.06	-0.03	-0.14	0.288	0.436	0.731	0.759	0.612	0.808	0.344
6330592	SNORD77	ILMN_3248294	SNORD77_ILMN_3248294	-0.12	-0.18	-0.13	0.02	0.04	-0.02	0.05	0.461	0.287	0.449	0.925	0.773	0.87	0.658
2690288	SNORA31	ILMN_3239162	SNORA31_ILMN_3239162	-0.12	-0.19	-0.15	-0.3	0.05	0.16	-0.02	0.302	0.139	0.236	0.0335	0.648	0.441	0.931
2000181	SNORA70B	ILMN_3243972	SNORA70B_ILMN_3243972	-0.13	0.19	-0.03	0.49	0.24	-0.05	0.25	0.448	0.286	0.868	0.229	0.207	0.627	0.04
6130092	SNORD61	ILMN_3237439	SNORD61_ILMN_3237439	-0.13	0.07	-0.01	0.05	0.13	-0.03	-0.02	0.266	0.524	0.944	0.706	0.322	0.788	0.861
3390113	SNORD45A	ILMN_3242525	SNORD45A_ILMN_3242525	-0.13	-0.02	0	-0.09	0.4	0.03	-0.13	0.311	0.892	0.978	0.379	0.0635	0.807	0.281
2370091	SNORD1B	ILMN_3245554	SNORD1B_ILMN_3245554	-0.14	0.12	0.01	1.73	3.07	0.22	-0.09	0.351	0.429	0.918	0.00232	2.1e-05	0.115	0.386
2320370	SNORD42A	ILMN_1668661	SNORD42A_ILMN_1668661	-0.14	-0.05	-0.21	0.02	0.19	0.09	0.2	0.262	0.701	0.115	0.898	0.134	0.612	0.107
2850040	SNORD79	ILMN_3241793	SNORD79_ILMN_3241793	-0.14	-0.15	-0.13	-0.05	-0.02	-0.03	-0.01	0.247	0.22	0.27	0.757	0.901	0.757	0.942
150278	SNORD114-7	ILMN_3309458	SNORD114-7_ILMN_3309458	-0.15	0.33	-0.11	-0.1	-0.02	-0.42	0.02	0.268	0.0388	0.423	0.494	0.938	0.0295	0.894
7560678	SNORD7	ILMN_3236404	SNORD7_ILMN_3236404	-0.15	-0.14	0.25	1.55	1.55	0.31	-0.38	0.456	0.499	0.246	2.24e-05	5.28e-05	0.0728	0.116
6100541	SNORD116-27	ILMN_3310745	SNORD116-27_ILMN_3310745	-0.16	-0.06	0.08	0.13	0.09	0.28	0.01	0.232	0.645	0.513	0.249	0.544	0.0812	0.908
2710687	SNORD114-1	ILMN_3308753	SNORD114-1_ILMN_3308753	-0.17	-0.16	-0.01	-0.19	-0.02	-0.06	-0.08	0.132	0.167	0.913	0.117	0.911	0.583	0.475
4480544	SNORA74A	ILMN_3236224	SNORA74A_ILMN_3236224	-0.18	-0.03	-0.12	0.73	1.8	0.11	0.21	0.283	0.833	0.484	0.00834	0.000375	0.367	0.104
5050685	SNORD124	ILMN_3235154	SNORD124_ILMN_3235154	-0.19	0.02	-0.17	0.32	0.01	-0.09	-0.03	0.306	0.932	0.353	0.05	0.962	0.482	0.825
150431	SNORD114-2	ILMN_3311085	SNORD114-2_ILMN_3311085	-0.2	0.1	-0.1	-0.26	-0.11	-0.26	-0.05	0.38	0.651	0.64	0.179	0.723	0.0447	0.644
6960433	SNORA53	ILMN_3239932	SNORA53_ILMN_3239932	-0.21	-0.01	-0.09	-0.01	0.69	-0.23	-0.01	0.253	0.957	0.608	0.935	0.1	0.2	0.891
3870358	SNORD32A	ILMN_1743217	SNORD32A_ILMN_1743217	-0.22	0.14	0.03	1	1.36	0.02	0.09	0.396	0.569	0.917	0.00581	0.000796	0.896	0.511
3800278	SNORA8	ILMN_3238707	SNORA8_ILMN_3238707	-0.23	0.09	0.1	1.21	1.46	0.03	-0.1	0.26	0.648	0.607	0.00424	0.000416	0.86	0.639
7210035	SNORD13	ILMN_1892403	SNORD13_ILMN_1892403	-0.26	-0.61	-0.48	3.95	4.31	1.86	-0.93	0.722	0.416	0.513	3.58e-06	1.26e-05	0.042	0.169
5690240	SNORA24	ILMN_3248890	SNORA24_ILMN_3248890	-0.27	0.34	-0.33	-0.42	0.28	-0.46	0.29	0.541	0.445	0.455	0.257	0.378	0.0905	0.493
4490754	SNORA11	ILMN_3236955	SNORA11_ILMN_3236955	-0.27	-0.74	-0.9	1.69	1.99	0.6	0.34	0.601	0.185	0.117	0.0173	0.00315	0.1	0.0106
650402	SNORA11D	ILMN_3242448	SNORA11D_ILMN_3242448	-0.28	-0.27	-0.06	1.68	1.81	0.52	0.07	0.414	0.422	0.86	0.000975	0.00093	0.0224	0.649
3870519	SNORD73A	ILMN_1667288	SNORD73A_ILMN_1667288	-0.29	-0.09	-0.25	0.31	0.59	0.37	0.26	0.201	0.669	0.259	0.345	0.148	0.167	0.182
830286	SNORD123	ILMN_3238972	SNORD123_ILMN_3238972	-0.29	-0.16	-0.31	0.13	0.58	-0.14	0.12	0.151	0.388	0.125	0.635	0.0171	0.211	0.272
4850053	SNORD113-4	ILMN_3310156	SNORD113-4_ILMN_3310156	-0.29	-0.25	0.03	-0.15	0.22	0.07	-0.11	0.0526	0.0867	0.826	0.378	0.124	0.635	0.306
3130278	SNORA11B	ILMN_3239704	SNORA11B_ILMN_3239704	-0.29	-0.54	-0.61	-0.03	0.38	0.33	0.64	0.506	0.242	0.194	0.972	0.264	0.271	0.0707
360112	SNORD114-4	ILMN_3309689	SNORD114-4_ILMN_3309689	-0.32	-0.27	-0.39	-0.14	-0.04	0.09	0.01	0.0517	0.0826	0.0232	0.383	0.784	0.477	0.93
1090148	SNORA18	ILMN_3244348	SNORA18_ILMN_3244348	-0.32	-0.39	-0.8	1.23	1.47	0.28	0.63	0.225	0.153	0.0149	3.62e-05	0.000346	0.636	0.294
4920435	SNORA11E	ILMN_3243921	SNORA11E_ILMN_3243921	-0.41	-0.65	-0.75	1.88	2.39	0.48	0.16	0.45	0.25	0.188	0.00833	0.000613	0.216	0.462
7200082	SNORD25	ILMN_1784328	SNORD25_ILMN_1784328	-0.52	-0.3	-0.7	-0.07	0.27	-0.44	-0.05	0.305	0.543	0.177	0.876	0.189	0.243	0.896
1090196	SNORA79	ILMN_3246206	SNORA79_ILMN_3246206	-0.58	-2.44	-2.31	1.42	2.59	2.11	1.52	0.631	0.0783	0.0916	0.215	0.0348	0.0506	0.0197
6510156	SNORA12	ILMN_3238435	SNORA12_ILMN_3238435	-1.11	-2.09	-1.34	1.16	2.62	1.63	0.7	0.273	0.0643	0.197	0.173	0.00327	0.0494	0.0231
