# Supplementary material for: Small Nucleolar RNAs Determine Resistance to Doxorubicin in Human Osteosarcoma
Source: Int J Mol Sci. 2020 Jun 24;21(12):4500. doi: 10.3390/ijms21124500 (PMC7349977; doi:10.3390/ijms21124500)
Supplement: Supplementary file 1 [file ijms-21-04500-s001.zip › ijms-837014 - supplementary/ijms-837014 - Supplementary - Table S2.xls]

## Sheet: SNOR3A
Table S2. Biological processes correlated with SNORD3A (Gene Ontology analysis).
GO Biological Process
Term	Overlap	P-value	Adjusted P-value	Z-score	Combined Score	Genes
RNA phosphodiester bond hydrolysis, exonucleolytic (GO:0090503)	6/26	4.72944e-05	0.115729	-2.80783	6.0551	EXOSC10;CNOT7;CNOT1;EXOSC9;CNOT2;EXOSC3
regulation of translational initiation (GO:0006446)	7/66	0.00170441	0.760404	-2.1003	0.575284	EIF2B4;EIF3M;DDX3X;EIF5;EIF3L;RPS6KB2;EIF3A
chromosome segregation (GO:0007059)	8/89	0.00237526	0.760404	-2.17572	0.595942	DDX3X;UBE2I;USP9X;ZNF207;KIF11;BUB3;NDC80;NUP37
attachment of spindle microtubules to kinetochore (GO:0008608)	3/11	0.00254932	0.760404	-2.71258	0.742991	ZNF207;BUB3;NDC80
positive regulation of NIK/NF-kappaB signaling (GO:1901224)	4/23	0.00281452	0.760404	-2.65455	0.727097	TRAF6;ZFP91;RC3H2;SASH1
protein polyubiquitination (GO:0000209)	12/186	0.00386998	0.760404	-2.24412	0.614678	PSMC6;PSMC4;UBE2D2;TRAF6;UBR5;UBC;ZFP91;UBE3A;UBE2G1;MARCH6;RC3H2;SASH1
regulation of transcription from RNA polymerase II promoter in response to stress (GO:0043618)	5/41	0.00423645	0.760404	-2.43332	0.666501	UBE2D2;UBC;VHL;KLF2;ATF4
establishment of spindle localization (GO:0051293)	4/26	0.00446532	0.760404	-2.51827	0.68977	SPIRE1;CLASP1;NDC80;PAFAH1B1
regulation of sister chromatid segregation (GO:0033045)	5/42	0.00470695	0.760404	-2.36163	0.646864	ZNF207;TTK;PSMG2;BUB3;DLGAP5
regulation of mitotic sister chromatid separation (GO:0010965)	5/42	0.00470695	0.760404	-2.35711	0.645626	ZNF207;TTK;PSMG2;BUB3;DLGAP5
regulation of mitotic sister chromatid segregation (GO:0033047)	5/42	0.00470695	0.760404	-2.35446	0.6449	ZNF207;TTK;PSMG2;BUB3;DLGAP5
regulation of microtubule cytoskeleton organization (GO:0070507)	8/100	0.00487663	0.760404	-2.26949	0.621627	EML4;CLIP1;XPO1;SPAST;CAPZB;TRIM37;CLASP1;CDK5R1
regulation of NIK/NF-kappaB signaling (GO:1901222)	4/27	0.00513458	0.760404	-2.50318	0.685635	TRAF6;ZFP91;RC3H2;SASH1
mitotic cell cycle (GO:0000278)	20/404	0.00538007	0.760404	-2.27301	0.622592	LIN54;AHCTF1;CDKN2C;CDC7;PDS5B;NDC80;CCNA2;PPP2CA;POLD3;CLIP1;XPO1;PSMC6;PSMC4;UBC;NUP88;CEP192;BUB3;CLASP1;NUP37;PAFAH1B1
regulation of mitotic metaphase/anaphase transition (GO:0030071)	5/44	0.00575721	0.760404	-2.30388	0.631045	ZNF207;TTK;PSMG2;BUB3;DLGAP5
regulation of metaphase/anaphase transition of cell cycle (GO:1902099)	5/45	0.00633979	0.760404	-2.24935	0.616111	ZNF207;TTK;PSMG2;BUB3;DLGAP5
ncRNA catabolic process (GO:0034661)	3/15	0.00650091	0.760404	-2.64172	0.723582	EXOSC10;EXOSC9;EXOSC3
gene expression (GO:0010467)	29/672	0.00651674	0.760404	-2.2977	0.629353	GTF3C2;CCNT2;TARS;ZNF45;RPL8;NR2C1;PPP2CA;NXF1;XPO1;RXRA;TAF1B;EXOSC9;UBC;EXOSC3;MAPK3;EIF2B4;USP9X;MED4;HARS2;MED7;PSMC6;CNOT7;EIF5;PSMC4;CNOT1;CNOT2;EEF1E1;EIF3A;TRIM33
microtubule anchoring (GO:0034453)	4/29	0.00666757	0.760404	-2.53254	0.693678	ZNF207;BUB3;NDC80;CLASP1
regulation of DNA-templated transcription in response to stress (GO:0043620)	5/46	0.00696252	0.760404	-2.26629	0.620751	UBE2D2;UBC;VHL;KLF2;ATF4
negative regulation of cellular component organization (GO:0051129)	22/474	0.00756771	0.760404	-2.45706	0.673003	DDX3X;CITED1;PRKCSH;TTK;CORO1B;EML4;PPP2CA;CAPZB;KATNA1;UBR5;ZNF207;RAD1;TRIM37;BUB3;PSMG2;PRKD1;JARID2;SHANK3;CLASP1;CDK5R1;PLXNA3;PAFAH1B1
positive regulation of mRNA 3'-end processing (GO:0031442)	3/16	0.00784668	0.760404	-2.68663	0.735885	CNOT7;CNOT1;LEO1
cytokinetic process (GO:0032506)	3/16	0.00784668	0.760404	-2.48043	0.679404	SPAST;SPIRE1;GTPBP8
RNA phosphodiester bond hydrolysis (GO:0090501)	7/89	0.00901841	0.760404	-2.2529	0.617083	EXOSC10;CNOT7;CNOT1;EXOSC9;CNOT2;PPP1R8;EXOSC3
mitotic spindle assembly checkpoint (GO:0007094)	4/32	0.00948983	0.760404	-2.35423	0.644837	ZNF207;TTK;PSMG2;BUB3
