# Supplementary material for: Small Nucleolar RNAs Determine Resistance to Doxorubicin in Human Osteosarcoma
Source: Int J Mol Sci. 2020 Jun 24;21(12):4500. doi: 10.3390/ijms21124500 (PMC7349977; doi:10.3390/ijms21124500)
Supplement: Supplementary file 1 [file ijms-21-04500-s001.zip › ijms-837014 - supplementary/ijms-837014 - Supplementary - Table S3.xls]

## Sheet: SNOR3A
Table S3. Drug perturbation processes correlated with SNORD3A (Gene Ontology analysis).
Drug Perturbations from GEO Upregulated
Term	Overlap	P-value	Adjusted P-value	Z-score	Combined Score	Genes
doxorubicin DB00997 human GSE58074 sample 3180	25/326	1.95317e-06	0.00173051	-1.71047	10.8775	RNU4-1;RNU6-1;LRPAP1;SNORD3C;SLC41A1;SNORD3D;SNORD3A;MAGT1;UBE3B;NXF1;RASD1;STK35;OVGP1;CHKB;C1ORF162;AP3B2;ACTA1;JSRP1;RN7SK;RAET1G;DMWD;ULBP2;NEUROG2;FBXL6;RNU4-2
Y15 23627197 human GSE43452 sample 2554	24/390	0.000113148	0.0501246	-1.75923	5.2658	RNU4-1;RNU6-1;SNORD3C;SNORD3D;SNORD3A;MAGT1;SNORA7B;NXF1;H1F0;RASD1;RN7SK;DMWD;SNORD68;SNORA28;ALB;SNORD83B;SNORD55;SNORA67;SNORD95;ULBP2;SNORA63;ATF4;RNU4-2;RMRP
azacitidine DB00928 human GSE29077 sample 2545	18/290	0.000713862	0.210827	-1.67945	2.61442	MRPS18B;TRIP4;JMJD1C;TARS;MARCH7;DDX50;RPAP3;COIL;PPP2CA;EIF5;PDCD10;UBC;ZNF207;ZNF146;C8ORF33;EIF3A;ATF4;UBQLN2
lung cancer DB00928 human GSE29077 sample 2536	16/280	0.00317772	0.703864	-1.67121	0.586878	DDX42;TARS;MARCH7;RPL8;MFF;RPAP3;CLIP1;EIF3M;EIF5;UBC;F2RL1;ZNF146;C8ORF33;EIF3A;TSPYL5;ATF4
estradiol DB00783 human GSE8597 sample 2731	20/397	0.00444812	0.788207	-1.81674	0.432375	POLQ;CDKN2C;CDCA4;SPIN4;FANCL;CDC7;MND1;TTK;KIF11;NDC80;GGCT;PSMC3IP;CCNA2;SYCE2;MELK;FIGNL1;USP1;ANKRD32;HIST1H4C;DLGAP5
puromycin, 2xEC50, 1d 439530 human GSE6930 sample 3371	16/308	0.00781899	0.890424	-1.69807	0.197073	ZFAND5;DDX42;NDC80;GGCT;POLD3;EIF3M;EIF5;MELK;PSMC4;EXOSC9;UBC;PRKD1;HIST1H4C;E2F6;TSPYL5;ATF4
Lipopolysaccharide 11970143 mouse GSE367 sample 3656	16/309	0.00805286	0.890424	-1.6711	0.193943	IREB2;WDR75;UBE3A;MARCH7;RPL8;MFF;RC3H2;PUM2;EIF3M;PSMC6;EIF5;XPO1;NDUFV2;CALM2;EPS15;PAFAH1B1
2,2',4,4',5,5'-Hexachlorobiphenyl (PCB-153) 37034 human GSE6878 sample 3348	18/364	0.00811674	0.890424	-1.75424	0.203592	TSPYL2;EIF2B4;DDX3X;MRFAP1L1;CDCA4;GAA;H1F0;CNOT7;RASD1;CAPZB;PDCD10;PPP1R8;ID3;NDUFV2;CALM2;ASF1A;TXNDC5;NUP37
Bisphenol A 6623 human GSE17624 sample 2662	16/313	0.00904494	0.890424	-1.69557	0.196783	DDX3X;SPIN4;UBE2D2;KIF11;RPL8;CCNA2;GGCT;PSMC6;SLTM;PDCD10;EIF3L;PPDPF;UBC;HIST1H4C;SMNDC1;ZNF146
